# Supplementary material for: Transcriptome Profiling Reveals B-Lineage Cells Contribute to the Poor Prognosis and Metastasis of Clear Cell Renal Cell Carcinoma
Source: Front Oncol. 2021 Aug 12;11:731896. doi: 10.3389/fonc.2021.731896 (PMC8416254; doi:10.3389/fonc.2021.731896)
Supplement: Supplementary file 7 [file DataSheet_2.csv]

Supplementary Table 2. DEGs - BC(B2M)
	p_val	avg_log2FC	pct.1	pct.2	p_val_adj
SAAL1	9.50E-11	-0.533577163	0.048	0.375	2.85E-07
STRADA	1.30E-10	-0.581930973	0.032	0.333	3.91E-07
TMEM41B	4.54E-10	0.269720959	0.065	0.333	1.36E-06
LTV1	4.54E-10	0.460154637	0.065	0.25	1.36E-06
SCYL1	9.44E-10	0.273496473	0.032	0.292	2.83E-06
ZNF667-AS1	1.07E-09	-0.366342644	0.016	0.292	3.20E-06
WDFY4	1.20E-09	-0.676693164	0.081	0.208	3.61E-06
FAM120AOS	1.53E-09	-0.260273885	0.081	0.125	4.58E-06
SESN1	1.82E-09	0.481205924	0.048	0.25	5.47E-06
ACSM3	3.11E-09	-0.841017236	0	0.208	9.32E-06
GLYR1	4.15E-09	0.631983546	0.065	0.125	1.25E-05
AGPAT2	4.15E-09	-0.465975882	0.048	0.208	1.25E-05
GUCD1	4.41E-09	-0.446140619	0.097	0.417	1.32E-05
FAM126A	6.23E-09	-0.324304442	0.081	0.25	1.87E-05
SMC1A	7.79E-09	0.837907609	0.097	0.417	2.34E-05
FCHO1	7.83E-09	0.265891127	0.097	0.542	2.35E-05
AUTS2	7.83E-09	0.442692302	0.097	0.208	2.35E-05
MCPH1	7.84E-09	0.641235255	0.097	0.208	2.35E-05
METTL17	1.04E-08	0.787964365	0.097	0.458	3.12E-05
SPOPL	1.23E-08	0.519057827	0.097	0.292	3.68E-05
NLRP1	1.31E-08	0.843032482	0.097	0.125	3.92E-05
NUDCD3	2.41E-08	0.392547986	0.081	0.125	7.24E-05
JAK3	2.55E-08	0.317735396	0.081	0.292	7.65E-05
SEC22B	2.84E-08	-0.257526814	0.081	0.375	8.53E-05
IL6ST	2.85E-08	0.437236829	0.113	0.333	8.54E-05
ZNF326	2.85E-08	0.422449819	0.097	0.167	8.55E-05
RIC1	2.99E-08	0.45499684	0.113	0.25	8.96E-05
CCNT2	3.01E-08	0.795052834	0.113	0.375	9.02E-05
ABCB7	3.17E-08	0.729269174	0.113	0.083	9.51E-05
MFN1	3.36E-08	-0.386407321	0.065	0.25	0.000100792
INSIG2	3.36E-08	-0.513560256	0.048	0.208	0.000100792
GRWD1	3.55E-08	0.518274624	0.113	0.167	0.000106403
CMC2	3.55E-08	-0.575628657	0.129	0.333	0.000106466
ACSL3	5.19E-08	0.3631134	0.081	0.208	0.000155583
CBL	7.53E-08	0.99231294	0.113	0.458	0.000225897
GOLGA8B	8.88E-08	-0.4868843	0.097	0.333	0.000266355
USP33	1.09E-07	0.877010643	0.129	0.292	0.000328402
BCAP29	1.10E-07	0.676831591	0.129	0.5	0.000328853
MED7	1.10E-07	0.564204863	0.065	0.292	0.000329125
ZCCHC8	1.10E-07	0.559356475	0.129	0.5	0.000329125
ZNF267	1.10E-07	0.328454425	0.097	0.417	0.000329306
PAX5	1.10E-07	0.494688165	0.129	0.125	0.000329306
SLC4A7	1.14E-07	1.019066263	0.129	0.5	0.000343179
UFSP2	1.15E-07	0.460277766	0.129	0.208	0.000345493
WDR6	1.21E-07	0.656510662	0.129	0.542	0.000363148
MED21	1.29E-07	0.379023718	0.129	0.042	0.000385646
DESI2	1.29E-07	0.309119123	0.097	0.5	0.000385646
BRMS1	1.35E-07	0.480977405	0.097	0.167	0.000405392
MPHOSPH10	1.35E-07	0.416567768	0.097	0.25	0.000406272
HTATIP2	1.50E-07	-0.384192501	0.065	0.25	0.000451139
MRPL39	1.67E-07	0.285964562	0.113	0.208	0.000499712
LST1	1.67E-07	0.719796823	0.081	0.167	0.00050038
EIF4EBP1	1.67E-07	0.483153726	0.081	0.167	0.00050038
CDC5L	1.76E-07	0.585600958	0.129	0.125	0.000527544
HTATSF1	1.76E-07	0.342217354	0.129	0.25	0.000527755
BAZ2A	1.76E-07	-0.281569909	0.113	0.167	0.000527825
DGKD	1.84E-07	1.021528405	0.113	0.208	0.000553406
GMCL1	1.95E-07	0.46793343	0.081	0.167	0.000584041
REXO2	1.95E-07	-0.822437087	0.129	0.542	0.000585278
CREBZF	1.95E-07	0.349889598	0.065	0.167	0.000585278
SSBP4	2.06E-07	0.270235582	0.129	0.208	0.000616714
NFKBIE	2.16E-07	0.608024117	0.129	0.375	0.000649352
EXOSC3	2.51E-07	0.693394873	0.113	0.417	0.000752497
SETDB2	2.52E-07	0.663471177	0.065	0.25	0.000757006
P4HA1	2.53E-07	0.254795561	0.145	0.125	0.00075799
YAF2	2.66E-07	0.362427792	0.145	0.417	0.000797819
TBPL1	2.80E-07	0.390121969	0.145	0.125	0.000839775
CASP3	2.80E-07	0.32428991	0.145	0.542	0.000839775
CDC73	3.10E-07	0.359611089	0.145	0.292	0.000930171
FBXO28	3.10E-07	0.466963195	0.145	0.25	0.000930171
ZNF148	3.10E-07	-0.41078603	0.129	0.292	0.00093029
MGAT1	3.25E-07	0.488520398	0.145	0.208	0.000974589
CENPM	3.40E-07	0.834409599	0.129	0.25	0.00101912
ATIC	3.43E-07	0.746362845	0.145	0.167	0.001029536
VMA21	3.43E-07	0.608440523	0.145	0.292	0.001029928
UBA3	3.61E-07	0.252613685	0.065	0.208	0.001082371
TMEM199	3.61E-07	0.604044489	0.145	0.333	0.001083193
SENP5	3.79E-07	0.34138454	0.113	0.292	0.001137247
CHD7	3.80E-07	0.969520039	0.145	0.083	0.001139543
GPR18	3.80E-07	0.44242511	0.145	0.25	0.001139975
CCDC174	3.80E-07	-0.314761153	0.145	0.25	0.001140118
SFSWAP	4.19E-07	0.353934427	0.145	0.417	0.001255968
CD22	4.20E-07	0.32709591	0.145	0.125	0.001261484
RNGTT	4.42E-07	0.547523674	0.145	0.083	0.001326089
SIPA1L3	4.65E-07	-0.742415295	0.032	0.208	0.001395095
FAM208A	5.14E-07	1.042201257	0.129	0.167	0.001541926
ASCC1	5.14E-07	0.711655957	0.145	0.25	0.001542687
NUP214	5.38E-07	0.37408145	0.113	0.458	0.001614958
NDUFV2-AS1	5.97E-07	0.37500613	0.081	0.125	0.001792321
DOK1	6.28E-07	-0.475681806	0.032	0.5	0.00188364
MTMR4	6.56E-07	0.973195224	0.113	0.375	0.001966532
PSD4	6.60E-07	0.523900089	0.113	0.167	0.001978956
SPEN	6.89E-07	1.172107671	0.145	0.292	0.00206666
RAB28	6.93E-07	0.913139043	0.113	0.417	0.002078163
RBM42	6.93E-07	0.551449783	0.129	0.208	0.00208042
GFER	7.29E-07	0.827581752	0.113	0.167	0.002186359
ZNF273	7.66E-07	0.336870616	0.032	0.125	0.002296934
NRDC	8.04E-07	0.317225331	0.145	0.375	0.002413176
STX16	8.45E-07	0.435269701	0.161	0.208	0.002535073
CAND1	8.45E-07	-0.486200529	0.129	0.333	0.002535374
TGIF1	8.88E-07	0.3116522	0.161	0.125	0.002662889
GSAP	8.88E-07	0.476958637	0.145	0.333	0.002663204
RAB3GAP2	9.23E-07	0.309704297	0.129	0.417	0.002769641
TIMM22	9.26E-07	0.811069251	0.145	0.083	0.002778811
MEF2C-AS1	9.30E-07	0.482100197	0.081	0.417	0.002790639
RSRC1	9.32E-07	0.301005402	0.161	0.25	0.002797228
KLHL28	9.79E-07	0.644597442	0.161	0.208	0.002936354
TRIAP1	9.79E-07	-0.276171968	0.177	0.167	0.002937734
NADSYN1	1.03E-06	-0.545730737	0.081	0.5	0.003077808
GPBP1L1	1.03E-06	0.324393507	0.161	0.5	0.003081413
DIMT1	1.08E-06	0.724901685	0.161	0.167	0.003237892
MED19	1.08E-06	0.282173365	0.161	0.125	0.003239402
ZBED5	1.13E-06	0.757614581	0.161	0.375	0.003393313
IMMT	1.19E-06	0.414410639	0.161	0.417	0.003556337
RP9	1.19E-06	0.765627659	0.161	0.542	0.003562516
TMX3	1.24E-06	0.67748549	0.113	0.083	0.003724328
DDX58	1.25E-06	0.697987447	0.065	0.167	0.003744134
ZFP62	1.25E-06	0.347298985	0.032	0.125	0.003748019
AVL9	1.31E-06	0.57813202	0.097	0.167	0.003925598
ERI3	1.31E-06	-0.695811554	0.032	0.417	0.003934171
MGAT5	1.31E-06	0.289995415	0.145	0.083	0.003934623
TRAPPC4	1.37E-06	0.253038736	0.113	0.25	0.004120236
ACAT2	1.38E-06	0.653336427	0.081	0.375	0.004129199
TCTN3	1.44E-06	0.841125999	0.161	0.25	0.004329067
RABEP2	1.51E-06	0.576048999	0.129	0.25	0.004530001
STIM1	1.51E-06	0.915634438	0.097	0.25	0.004530001
CTBP1	1.58E-06	0.573991563	0.129	0.333	0.004727077
EFCAB14	1.58E-06	0.499473093	0.129	0.5	0.004753361
CNR2	1.59E-06	0.774615032	0.145	0.208	0.004761431
KIF9	1.59E-06	0.278742564	0.129	0.208	0.004766818
DCAF13	1.59E-06	0.5289735	0.161	0.167	0.004770053
ABHD13	1.59E-06	0.57361426	0.129	0.083	0.00477221
MAPK6	1.74E-06	0.324591898	0.113	0.208	0.005219938
CTDSPL2	1.82E-06	0.804250106	0.129	0.167	0.00545877
PLRG1	1.92E-06	0.500465064	0.113	0.333	0.005757343
C2orf69	1.92E-06	0.300541503	0.097	0.333	0.005766967
ANKH	1.92E-06	0.363458744	0.065	0.333	0.005773391
ZNF493	2.01E-06	0.313687083	0.129	0.417	0.006024463
ODF3B	2.11E-06	0.577378312	0.161	0.375	0.006343361
TMEM248	2.22E-06	0.339658426	0.177	0.25	0.006666575
SNX20	2.32E-06	0.441560103	0.129	0.417	0.006947391
EP300	2.33E-06	0.274931956	0.113	0.25	0.006982517
FAM102A	2.33E-06	0.55018088	0.161	0.083	0.006989407
ARL16	2.33E-06	-0.54588269	0.081	0.333	0.006989407
RAB11B	2.33E-06	-0.429319855	0.194	0.333	0.006989407
KPNA3	2.43E-06	0.5808133	0.129	0.5	0.007284145
KPNA6	2.44E-06	0.775424796	0.081	0.25	0.007312841
USP6NL	2.44E-06	0.441498315	0.145	0.333	0.007328823
RPS6KA5	2.44E-06	0.866453457	0.113	0.083	0.007328823
TRNAU1AP	2.55E-06	1.133256586	0.129	0.208	0.007654006
SEMA4B	2.56E-06	0.557359208	0.113	0.167	0.007666504
MKNK2	2.56E-06	0.267455648	0.129	0.333	0.007674845
SECISBP2L	2.56E-06	0.268165192	0.177	0.167	0.007682358
TBC1D5	2.68E-06	0.330895861	0.161	0.125	0.008050492
EFR3A	2.68E-06	0.45039499	0.177	0.5	0.008053979
AP1M1	2.81E-06	0.693195598	0.161	0.458	0.008432804
ARHGEF2	2.81E-06	0.305086451	0.113	0.167	0.008438263
NOLC1	2.81E-06	0.418294915	0.177	0.167	0.008441905
USP1	2.95E-06	-0.26471921	0.145	0.25	0.008847724
TMEM38B	2.95E-06	0.699672266	0.177	0.083	0.008847724
MAN1B1	3.05E-06	0.934529246	0.145	0.375	0.009153797
BCL2L13	3.07E-06	0.332484605	0.177	0.417	0.009216802
TMEM170A	3.08E-06	0.427636535	0.113	0.333	0.009237553
INO80	3.08E-06	0.632197809	0.097	0.125	0.009237553
PHKB	3.36E-06	0.691601859	0.161	0.333	0.010090129
DMAP1	3.37E-06	0.875278813	0.145	0.25	0.010120204
TMEM41A	3.38E-06	0.672568087	0.097	0.167	0.010142808
KCNAB2	3.39E-06	0.688425988	0.129	0.25	0.01015898
TUBGCP2	3.39E-06	0.898036953	0.177	0.208	0.010169773
C1GALT1	3.39E-06	0.253174877	0.177	0.292	0.010179495
PSMC2	3.54E-06	0.54130859	0.145	0.292	0.010626755
NUBP1	3.71E-06	1.005801492	0.113	0.25	0.011132798
NFATC3	3.72E-06	0.505446112	0.081	0.167	0.011162159
GORASP2	3.72E-06	0.270203524	0.145	0.208	0.011172744
TATDN3	3.85E-06	1.251846994	0.177	0.458	0.01155824
UBL7	3.89E-06	0.889388933	0.177	0.25	0.011661898
ACIN1	3.90E-06	0.70174034	0.177	0.167	0.011704803
NSFL1C	3.90E-06	0.869932431	0.177	0.125	0.011704803
GNA13	3.90E-06	0.90901583	0.177	0.083	0.011704803
LINC01480	4.08E-06	0.529304024	0.048	0.333	0.01225469
HELLS	4.08E-06	0.534390732	0.048	0.292	0.01225469
ZNF107	4.09E-06	0.89320376	0.177	0.25	0.012259812
CDKN2D	4.28E-06	0.751620678	0.161	0.125	0.012838658
RBM7	4.28E-06	0.52994703	0.177	0.125	0.012839994
GOT1	4.28E-06	-0.545035636	0.145	0.167	0.012839994
BEX2	4.48E-06	0.481616676	0.177	0.208	0.013446432
GNL2	4.68E-06	0.556416748	0.145	0.333	0.014051215
HDAC7	4.69E-06	0.412314736	0.097	0.25	0.014065729
PURA	4.87E-06	0.614297477	0.145	0.417	0.01461579
CAPN12	4.90E-06	0.531034597	0.097	0.25	0.014689677
FAM111A	4.90E-06	0.819295174	0.145	0.292	0.014712357
ZPR1	5.14E-06	0.259545624	0.194	0.292	0.015428491
PSME4	5.38E-06	0.497861425	0.097	0.208	0.016125114
BORCS6	5.61E-06	0.792105399	0.129	0.333	0.016817682
MYO9B	5.88E-06	0.511256952	0.097	0.208	0.017640432
CLASRP	5.89E-06	0.45591078	0.161	0.292	0.017667228
IGSF8	5.90E-06	0.368679686	0.065	0.25	0.017685111
ARMCX3	6.18E-06	0.703808989	0.129	0.125	0.018525693
COCH	6.39E-06	0.648728002	0.145	0.25	0.019156533
SIRT7	6.45E-06	0.926120782	0.097	0.292	0.01934992
TM2D2	6.46E-06	0.261413726	0.065	0.25	0.019369346
TIFA	6.46E-06	0.391952481	0.161	0.292	0.019388788
HDAC3	6.68E-06	1.367533717	0.161	0.208	0.020046201
LRCH3	6.75E-06	0.816649016	0.081	0.125	0.020247736
TMED8	7.08E-06	-0.581009446	0.032	0.25	0.021225417
PXK	7.08E-06	0.329750684	0.194	0.25	0.021227529
ITPR1	7.40E-06	0.320581849	0.194	0.042	0.022206124
SNX9	7.40E-06	0.345838187	0.194	0.167	0.022208325
MAP4K1	7.40E-06	0.501458659	0.194	0.208	0.022208325
TMEM126B	7.62E-06	0.974175435	0.161	0.125	0.022856598
ST8SIA4	7.74E-06	0.412610818	0.194	0.292	0.023230075
ANKRD10	7.74E-06	-0.338843696	0.194	0.292	0.023232368
IRF7	8.06E-06	0.469757371	0.161	0.167	0.02416803
AATF	8.10E-06	0.74032994	0.161	0.25	0.024291915
LNPEP	8.10E-06	0.490867755	0.194	0.333	0.024299078
LAIR1	8.10E-06	0.492032291	0.145	0.042	0.024301466
PPID	8.47E-06	0.770111625	0.194	0.333	0.02541501
TMC8	8.86E-06	0.436641526	0.129	0.208	0.026579825
LRPPRC	8.86E-06	0.789627762	0.161	0.125	0.026582415
ANAPC1	9.25E-06	0.705076037	0.081	0.417	0.027744332
OGFR	9.26E-06	0.628085144	0.194	0.208	0.02777128
S100PBP	9.66E-06	0.545524173	0.097	0.417	0.028968911
PTK2B	9.69E-06	0.663308818	0.177	0.125	0.029055868
NOB1	9.69E-06	0.563162821	0.194	0.208	0.029055868
C3orf38	9.69E-06	0.734109923	0.194	0.417	0.029067104
GABPB1-AS1	1.01E-05	0.480486786	0.194	0.042	0.030388247
ATG5	1.01E-05	0.793787993	0.194	0.125	0.030391172
ISY1	1.05E-05	0.70276115	0.177	0.542	0.031408986
THAP2	1.11E-05	0.725126915	0.194	0.167	0.033182441
OSTM1	1.11E-05	0.83639023	0.161	0.208	0.033210959
ATP2A3	1.15E-05	0.514748543	0.194	0.542	0.034441547
NBAS	1.16E-05	0.587226232	0.097	0.167	0.034651891
TUBA1C	1.16E-05	-0.254550121	0.194	0.458	0.034704638
FAM177B	1.16E-05	0.652532309	0.194	0.333	0.034704638
ZNF22	1.16E-05	0.81402247	0.194	0.292	0.034717835
CKLF	1.20E-05	0.529689894	0.194	0.417	0.036094478
RHBDF2	1.21E-05	1.392142658	0.194	0.125	0.036166349
ZCCHC9	1.21E-05	0.415363555	0.065	0.25	0.03625206
POLDIP3	1.26E-05	1.255927791	0.145	0.083	0.037851013
JAGN1	1.26E-05	0.481927004	0.194	0.083	0.037908146
CRBN	1.32E-05	0.602388506	0.161	0.208	0.039498733
KLF12	1.32E-05	0.924603831	0.145	0.208	0.039554404
ECSIT	1.32E-05	-0.337281797	0.048	0.458	0.039613856
SND1	1.32E-05	-0.325351983	0.129	0.208	0.039628731
TMEM222	1.36E-05	0.629529377	0.161	0.208	0.040945836
AKAP8L	1.38E-05	0.451026385	0.113	0.333	0.041272852
TAF9	1.38E-05	-0.390491177	0.226	0.583	0.041408113
CDK6	1.44E-05	0.616373669	0.097	0.167	0.043183087
ST6GALNAC4	1.44E-05	0.44259497	0.129	0.333	0.043183087
TNKS	1.44E-05	0.504404516	0.081	0.25	0.043183087
TRIM26	1.44E-05	0.341034713	0.081	0.208	0.043223301
CARD8	1.44E-05	0.334304561	0.21	0.292	0.04325952
ARMC8	1.44E-05	0.524585232	0.113	0.083	0.043263546
SMARCA2	1.44E-05	-0.312913099	0.194	0.542	0.043263546
PNOC	1.51E-05	0.257998649	0.145	0.125	0.045193912
UIMC1	1.51E-05	0.604936426	0.161	0.208	0.045193912
FAM192A	1.57E-05	-0.404873732	0.113	0.417	0.047062686
TWF1	1.57E-05	0.700126365	0.129	0.208	0.0471279
WDFY2	1.57E-05	0.991319305	0.145	0.167	0.047171415
NUFIP2	1.57E-05	0.507145674	0.161	0.375	0.047210607
ZNF226	1.64E-05	0.893448598	0.129	0.333	0.049064228
WDR11	1.64E-05	0.356765927	0.081	0.25	0.049226889
UBR5-AS1	1.71E-05	0.536717575	0.097	0.417	0.051414794
MECP2	1.79E-05	0.88006766	0.177	0.083	0.0537882
AGO2	1.87E-05	0.839837677	0.081	0.125	0.056071707
NIPSNAP3A	1.87E-05	0.519165403	0.081	0.292	0.056071707
PARN	1.87E-05	0.75484814	0.081	0.292	0.056122601
FAM214A	1.87E-05	0.372144525	0.129	0.25	0.056173532
LRRC59	1.87E-05	0.664222257	0.161	0.042	0.056173532
LINC00667	1.95E-05	0.477007502	0.21	0.5	0.058548228
TRAPPC2	1.95E-05	0.382994437	0.065	0.125	0.058601141
KIDINS220	1.95E-05	-0.323216109	0.048	0.167	0.058632907
NFATC1	1.96E-05	0.397144362	0.194	0.167	0.058654093
GPCPD1	1.96E-05	0.26899741	0.194	0.167	0.058654093
SP140L	1.96E-05	-0.649215614	0.21	0.25	0.058654093
BATF	2.03E-05	0.496408231	0.21	0.792	0.061046264
TM9SF3	2.04E-05	0.3450865	0.065	0.125	0.061183708
UBE2S	2.04E-05	0.416960785	0.081	0.167	0.061183708
FBXL3	2.12E-05	0.580715745	0.177	0.417	0.063611734
SDHA	2.13E-05	-0.348302332	0.129	0.292	0.063874419
RPRD1A	2.13E-05	0.381120919	0.129	0.167	0.063931638
LCK	2.20E-05	0.9412943	0.177	0.625	0.066026121
PSME3	2.22E-05	0.342952516	0.129	0.208	0.066713219
GRSF1	2.22E-05	0.376159278	0.177	0.125	0.066713219
RBL2	2.22E-05	0.598084194	0.21	0.333	0.066713219
CA2	2.22E-05	-0.446727091	0.048	0.333	0.066731063
NUP107	2.31E-05	1.033585816	0.113	0.292	0.069313747
MTHFD2L	2.32E-05	-0.288302408	0.048	0.292	0.069634579
UBE2G2	2.42E-05	0.527743976	0.129	0.25	0.072478512
RHOQ	2.42E-05	-0.720722169	0.048	0.25	0.072677416
TTC17	2.42E-05	0.349552776	0.194	0.25	0.072696688
TIMM10	2.42E-05	0.622198835	0.21	0.333	0.072696688
KIF20B	2.53E-05	0.782213534	0.21	0.417	0.075846488
SYTL1	2.53E-05	0.57278391	0.194	0.125	0.075846488
IST1	2.53E-05	0.288040656	0.161	0.167	0.075866512
CDPF1	2.53E-05	-0.465060031	0.032	0.25	0.075866512
ETS1	2.53E-05	0.728180731	0.194	0.042	0.075866512
NANS	2.53E-05	-0.406110633	0.145	0.458	0.075866512
PLPP5	2.53E-05	0.307023169	0.177	0.083	0.075873188
IVNS1ABP	2.53E-05	-0.65843337	0.242	0.25	0.075873188
MIIP	2.63E-05	0.257065322	0.113	0.292	0.078786796
FLYWCH2	2.63E-05	0.407592164	0.097	0.25	0.079035839
NARF	2.64E-05	0.311712488	0.177	0.25	0.079105128
RNF4	2.75E-05	0.634805428	0.194	0.333	0.082612055
BOLA3	2.86E-05	0.360776695	0.097	0.333	0.085929598
CDK10	2.87E-05	0.449288107	0.081	0.333	0.08604166
MAP4K4	2.87E-05	1.173880253	0.194	0.375	0.086161319
DDRGK1	2.87E-05	0.574398573	0.177	0.25	0.086161319
MCFD2	2.99E-05	1.170877456	0.161	0.292	0.089839837
ORC4	3.11E-05	0.733836207	0.161	0.375	0.093345352
ZNF766	3.12E-05	0.84932791	0.113	0.167	0.093514382
ARHGAP1	3.12E-05	0.668611317	0.065	0.375	0.093715922
TSPYL1	3.13E-05	-0.855342099	0.29	0.417	0.09378856
ANKRD39	3.13E-05	-0.387913235	0.032	0.208	0.09378856
ALOX5	3.13E-05	0.88970556	0.177	0.167	0.093796634
MS4A7	3.25E-05	0.98286451	0.113	0.417	0.09736575
UBALD2	3.25E-05	0.800883468	0.113	0.208	0.09736575
CASP6	3.26E-05	-0.604766276	0.032	0.292	0.097826005
BET1	3.26E-05	0.299772005	0.177	0.208	0.097834389
NLRC5	3.37E-05	0.694804185	0.161	0.208	0.100996401
TNFRSF1B	3.38E-05	0.721716936	0.145	0.292	0.101307679
NUP210	3.39E-05	0.419056892	0.161	0.667	0.101732571
PCID2	3.40E-05	0.967430389	0.21	0.375	0.102002101
SDF2	3.40E-05	0.332136856	0.161	0.125	0.102028214
COMMD5	3.40E-05	0.324229766	0.145	0.083	0.102036919
MRPL47	3.40E-05	-0.48832574	0.226	0.333	0.102036919
CCT7	3.55E-05	-0.277190492	0.21	0.25	0.106374393
EMC6	3.55E-05	-0.629223131	0.177	0.417	0.106401505
OSBPL8	3.55E-05	-0.496268654	0.177	0.208	0.106410543
CCDC69	3.70E-05	1.106522119	0.177	0.125	0.110924275
CYP20A1	3.70E-05	1.012339093	0.129	0.083	0.110952421
UBE3A	3.70E-05	0.429977916	0.21	0.083	0.110961804
DCUN1D5	3.70E-05	0.405444955	0.226	0.208	0.110961804
CHERP	3.85E-05	0.265596857	0.065	0.125	0.115600104
TMEM70	3.86E-05	0.330498013	0.21	0.167	0.115697478
ABCE1	4.00E-05	0.57722173	0.145	0.458	0.120059447
MRPS33	4.02E-05	0.386621036	0.161	0.333	0.120584146
KMT2E-AS1	4.02E-05	0.73251055	0.177	0.042	0.120624581
CCNK	4.02E-05	0.813190872	0.21	0.042	0.120624581
FABP5	4.18E-05	0.414055576	0.226	0.458	0.125540657
HELZ	4.19E-05	0.772657143	0.161	0.25	0.125645483
GPANK1	4.34E-05	0.525979064	0.129	0.125	0.130170209
DHX29	4.36E-05	0.575111942	0.177	0.208	0.130701706
SAMD8	4.37E-05	0.324297116	0.194	0.333	0.13108238
SESN3	4.55E-05	0.698227184	0.194	0.083	0.136617077
STARD7	4.75E-05	0.363919224	0.194	0.208	0.142396416
HDHD3	4.92E-05	0.254666146	0.113	0.25	0.14771501
NOP16	4.92E-05	0.469564333	0.145	0.25	0.14771501
LILRB1	4.93E-05	0.390046659	0.097	0.333	0.147969661
CEP350	4.94E-05	0.615344908	0.145	0.208	0.148151763
MXD1	4.94E-05	0.462976222	0.21	0.083	0.148273261
IP6K2	4.94E-05	0.399747148	0.177	0.167	0.148346197
BTLA	4.95E-05	-0.782509937	0.145	0.333	0.148394836
PCF11	4.95E-05	-0.331518499	0.177	0.333	0.148394836
STT3A	5.15E-05	0.551556079	0.081	0.375	0.15438011
UTP6	5.15E-05	0.345496053	0.177	0.375	0.154581803
MACF1	5.15E-05	0.298948752	0.194	0.167	0.154619643
CCDC47	5.15E-05	0.395461361	0.161	0.25	0.154632258
ABT1	5.15E-05	0.569118231	0.226	0.125	0.154632258
CD2BP2	5.15E-05	0.62910037	0.226	0.375	0.154632258
FBXO21	5.35E-05	1.19258524	0.129	0.208	0.160386132
CPNE5	5.36E-05	0.603321968	0.226	0.292	0.160856068
C12orf10	5.37E-05	0.391743076	0.194	0.583	0.160986794
SDF4	5.37E-05	0.668867202	0.226	0.125	0.16106527
DEF6	5.37E-05	0.513098833	0.226	0.208	0.161104519
ANXA2R	5.59E-05	0.410718485	0.145	0.208	0.167805826
IRF2BP2	5.59E-05	0.418754627	0.226	0.167	0.167846532
CDK12	5.60E-05	0.317536389	0.194	0.375	0.167860102
FBXW11	5.83E-05	0.55482502	0.226	0.375	0.174813015
TES	5.83E-05	0.83275129	0.194	0.167	0.174869301
FDPS	6.05E-05	0.395546096	0.194	0.292	0.181644877
SIN3A	6.06E-05	0.686952563	0.113	0.125	0.181863398
RBM38	6.07E-05	0.481430355	0.194	0.25	0.182009191
PTAR1	6.07E-05	0.718171411	0.161	0.458	0.182155074
DNAJC2	6.07E-05	0.320543098	0.145	0.083	0.182155074
DYNLL2	6.32E-05	-0.269531603	0.048	0.25	0.189667119
ARRDC1	6.32E-05	-0.328501102	0.065	0.167	0.189667119
WDR33	6.32E-05	-0.389415887	0.258	0.5	0.189712502
IL4R	6.32E-05	0.403689056	0.145	0	0.189727632
HLA-DOA	6.32E-05	0.602324188	0.194	0.125	0.189727632
ATG3	6.32E-05	0.730776946	0.177	0.125	0.189727632
SCNM1	6.57E-05	0.647971325	0.145	0.208	0.197049123
GNL1	6.58E-05	0.712998463	0.226	0.167	0.197440726
STAG1	6.58E-05	0.868467221	0.226	0.375	0.197440726
ZNF821	6.58E-05	0.94352848	0.161	0	0.197534799
FAM76A	6.58E-05	0.2606056	0.048	0.125	0.197534799
PTDSS1	6.59E-05	0.422277799	0.161	0.167	0.197597534
PRPF31	6.84E-05	0.455246252	0.161	0.333	0.205207203
TRPT1	6.85E-05	-0.55449681	0.081	0.458	0.205450696
UFL1	6.86E-05	0.280079966	0.242	0.458	0.205710666
SH2D3C	7.13E-05	0.935371419	0.097	0.25	0.213936541
MX1	7.14E-05	0.449171775	0.226	0.333	0.214256558
SLC30A7	7.40E-05	0.906821938	0.129	0.125	0.22212581
PDXDC1	7.40E-05	0.391488328	0.145	0.5	0.22212581
SLC35C2	7.43E-05	0.29658464	0.065	0.333	0.222927718
NUP88	7.44E-05	0.715122223	0.177	0.208	0.223084872
CCDC57	7.44E-05	0.961496411	0.177	0.083	0.223102339
PSMG4	7.72E-05	0.690171098	0.097	0.292	0.23164165
BCL7B	7.74E-05	0.917981641	0.226	0.292	0.232202145
AKIRIN2	7.74E-05	-0.332902501	0.258	0.292	0.232256442
PAF1	7.74E-05	-0.266811952	0.161	0.375	0.232256442
SHMT2	7.74E-05	0.41081606	0.145	0.167	0.232274543
TMEM216	8.03E-05	0.688888237	0.113	0.375	0.240753839
ERGIC1	8.04E-05	0.974551238	0.194	0.417	0.241146674
XPO1	8.05E-05	0.71974948	0.129	0.292	0.24142757
AMZ2	8.06E-05	0.358935773	0.226	0.125	0.241802486
RABGGTB	8.06E-05	-0.714635157	0.306	0.417	0.241802486
GSDMD	8.34E-05	0.410145864	0.194	0.292	0.250070612
ASB8	8.38E-05	0.37910122	0.194	0.208	0.251504763
ERAP2	8.39E-05	0.468013015	0.21	0.167	0.25162132
ATF7IP2	8.39E-05	-0.382712326	0.258	0.25	0.251679614
CTNNB1	8.39E-05	0.635949535	0.21	0.125	0.251679614
UTP23	8.39E-05	0.3673861	0.113	0.125	0.251699047
RMND5B	8.72E-05	0.570529005	0.081	0.25	0.261575096
MTMR6	8.73E-05	0.887593412	0.226	0.292	0.26189701
CDKN2AIP	8.73E-05	0.815162499	0.226	0.375	0.26189701
RCC1	8.73E-05	0.571225183	0.226	0.083	0.261957403
HDAC9	8.73E-05	0.777789284	0.226	0.292	0.261957403
ING1	9.03E-05	1.027012575	0.161	0.333	0.270904023
GTF3C5	9.06E-05	0.70731331	0.113	0.25	0.271922464
CHD6	9.07E-05	0.439443842	0.081	0.375	0.272234813
HEXIM1	9.09E-05	0.593308815	0.145	0.333	0.272568285
HMCES	9.09E-05	-0.26408816	0.032	0.5	0.272630845
B4GALT1	9.09E-05	-0.595202236	0.274	0.25	0.272651701
RIT1	9.45E-05	0.384428825	0.065	0.167	0.283519779
UBLCP1	9.45E-05	0.632375944	0.177	0.292	0.283519779
COPS8	9.46E-05	0.469622511	0.242	0.25	0.283714146
MAPK1	9.83E-05	-0.589845783	0.065	0.333	0.29502067
IKBKB	0.00010232	0.648527785	0.065	0.292	0.306961017
NPEPPS	0.00010239	1.134264573	0.21	0.083	0.307169487
TSG101	0.000102398	0.612118506	0.161	0.042	0.307192657
GOSR1	0.000106085	0.464882154	0.129	0.208	0.318254849
R3HDM2	0.000106252	0.95743778	0.097	0.167	0.318757402
ARMC1	0.000106372	0.419126582	0.081	0.25	0.319116736
DNAJC9	0.000106452	0.672910768	0.113	0.125	0.319356462
DENND2D	0.000110534	1.246262679	0.161	0.25	0.331602894
FUBP1	0.000110791	0.458014904	0.161	0.167	0.332372151
FLAD1	0.00011456	0.629983738	0.161	0.542	0.34367961
ADAM19	0.000115193	-0.314261356	0.129	0.25	0.345577782
IGLC3	0.000115244	0.373383475	0.081	0.25	0.345732033
COPS3	0.000115244	0.55909201	0.242	0.208	0.345732033
PTCD3	0.000119724	0.804840757	0.194	0.208	0.359171542
PTPN22	0.000119813	0.360525584	0.21	0.167	0.359437554
PJA2	0.000119866	0.368241844	0.21	0.167	0.359597233
SH3BP1	0.000123929	0.966558302	0.161	0.25	0.371786294
ZCCHC17	0.000124377	0.297055057	0.097	0.417	0.37313217
MKLN1	0.000124699	0.545852928	0.194	0.333	0.374095746
EBAG9	0.000129676	-0.300766132	0.097	0.208	0.389029344
CLINT1	0.000129676	0.289452216	0.242	0.208	0.389029344
RFTN1	0.000134831	0.386017738	0.242	0.208	0.404493936
NARFL	0.000140097	0.319664441	0.065	0.125	0.420292274
ZC3H12A	0.000140158	0.408553291	0.242	0.25	0.420475459
KDM5A	0.000140189	0.372186312	0.226	0.125	0.420567074
ALDH9A1	0.000140199	0.844503406	0.226	0.125	0.420597615
ARFGEF1	0.000145389	0.463763223	0.129	0.292	0.436167005
SLC39A1	0.000145547	0.521977608	0.081	0.25	0.436640322
PHF21A	0.000145652	0.364964941	0.065	0.542	0.436956079
EDEM1	0.000151141	0.81504711	0.113	0.167	0.453424229
LETMD1	0.000151141	0.645178905	0.161	0.292	0.453424229
TCTN1	0.000151414	0.541523275	0.097	0.25	0.454240587
UPF3B	0.000151479	0.572924571	0.242	0.167	0.454436675
CCAR1	0.000151512	0.474468129	0.242	0.25	0.454534743
TMED4	0.000151522	-0.33546625	0.194	0.208	0.454567436
NDUFV3	0.000157457	-0.40987017	0.048	0.5	0.472370102
COIL	0.00016869	0.954120605	0.161	0.333	0.506069948
ZNF146	0.000169458	0.809834004	0.129	0.375	0.508374855
BRAF	0.000169458	0.254859976	0.113	0.5	0.508374855
TRABD	0.000169892	0.267697116	0.258	0.375	0.509674779
TMEM138	0.000170012	0.258779387	0.065	0.125	0.510036305
TMEM242	0.000170084	0.602547539	0.145	0.125	0.510253313
CXXC5	0.000170121	1.096541236	0.226	0.167	0.510361842
C20orf27	0.000174072	1.316661759	0.177	0.583	0.522214533
SDHB	0.0001768	-0.306357796	0.161	0.292	0.530399133
TMEM218	0.000183261	0.306397023	0.097	0.417	0.549782605
RELB	0.000183712	0.277383594	0.258	0.083	0.551135571
ARF3	0.00018976	0.823986819	0.129	0.167	0.569279228
HMGN4	0.000190744	0.59878758	0.21	0.042	0.572232432
LENG8	0.000198167	1.079916615	0.226	0.333	0.594501884
TSEN34	0.000198167	0.701862248	0.113	0.208	0.594501884
DDHD1	0.000205719	1.362269394	0.226	0.417	0.617156495
TSEN2	0.000205861	0.666598304	0.065	0.333	0.617583717
SCAMP2	0.000205861	0.326840802	0.258	0.5	0.617583717
ZFAND2B	0.000213159	0.49042849	0.21	0.292	0.639475844
RDH14	0.000213688	0.525959089	0.097	0.167	0.64106375
PARP8	0.000213923	0.267798579	0.258	0.333	0.641770414
SEC14L1	0.000221946	0.609099016	0.194	0.333	0.665838621
KRAS	0.00022219	1.050821123	0.242	0.25	0.66656899
RAB5A	0.000222235	0.863344506	0.242	0.083	0.666706
SNHG9	0.000222251	-0.284960952	0.129	0.208	0.666751674
TFEB	0.000228935	1.665864138	0.242	0.208	0.686806373
UMAD1	0.000229499	0.709339161	0.161	0.333	0.688497053
CCDC186	0.000230268	0.573609761	0.161	0.208	0.690803142
RFXANK	0.000230268	0.359692592	0.113	0.25	0.690803142
ABLIM1	0.000230818	0.37024068	0.258	0.125	0.692453802
MARCKSL1	0.000230818	-0.439434026	0.258	0.292	0.692453802
TOR3A	0.000239532	0.367567392	0.258	0.167	0.718595923
PUM1	0.000239532	0.54991997	0.258	0.542	0.718595923
ELF2	0.000239695	0.366285106	0.145	0.125	0.719083566
RBBP7	0.000248874	0.981832446	0.21	0.292	0.746621495
GOLT1B	0.000248891	0.916745097	0.242	0.25	0.746671891
PANK2	0.000256962	0.649000789	0.129	0.25	0.770885964
HEXA	0.0002584	0.620697234	0.21	0.125	0.775198564
MNDA	0.000276288	0.465928032	0.177	0.333	0.82886393
BTN3A1	0.000276288	1.027806283	0.145	0.292	0.82886393
TEX264	0.000278134	0.261900441	0.161	0.417	0.834400966
FYTTD1	0.000278485	0.404472889	0.161	0.208	0.835456024
PARL	0.000288705	0.530265836	0.145	0.333	0.866115316
TSPYL2	0.000288896	0.363923612	0.258	0.375	0.866688714
NARS	0.000299849	0.258909904	0.177	0.417	0.899548402
CASP2	0.000299968	0.270418117	0.048	0.25	0.899903834
CTCF	0.000308954	0.499180177	0.145	0.5	0.926861697
PTPN4	0.000310681	0.724371282	0.113	0.208	0.932043935
SCPEP1	0.000311313	0.281695821	0.242	0.25	0.93393911
RAC1	0.000332704	0.665950025	0.177	0.542	0.998111014
SENP7	0.00033409	1.207039655	0.145	0.375	1
CUX1	0.000335284	0.853609843	0.129	0.25	1
RNF41	0.000335306	0.628513714	0.258	0.208	1
MALSU1	0.000335306	0.50334992	0.177	0.208	1
PTPMT1	0.000346013	0.339222291	0.161	0.333	1
ADD1	0.000347873	0.399616903	0.258	0.125	1
ADAR	0.000347895	0.726309607	0.258	0.167	1
STK24	0.000347895	-0.585686917	0.016	0.458	1
SUPT16H	0.000347895	0.8670709	0.177	0.417	1
PSPC1	0.000358984	1.263006841	0.161	0.208	1
PPP1R12A	0.000360463	0.309029564	0.274	0.333	1
BIRC2	0.000360463	0.59875647	0.258	0.542	1
FUOM	0.000360463	0.553594995	0.145	0.167	1
MORC3	0.000374173	0.293500543	0.274	0.25	1
NXT1	0.000374388	-0.368274144	0.274	0.167	1
MCM5	0.000388269	0.414756494	0.145	0.125	1
FMNL1	0.000388343	0.846399512	0.21	0.083	1
SOD2	0.000388368	-0.537557537	0.355	0.458	1
FYN	0.000400674	0.413175061	0.129	0.333	1
RAD51C	0.000402554	0.429744082	0.081	0.208	1
ABI1	0.000402707	-0.702904329	0.323	0.458	1
SMU1	0.000402707	0.32416112	0.226	0.125	1
RB1CC1	0.000402783	0.381439193	0.258	0.417	1
MAML2	0.000416831	0.576855901	0.097	0.167	1
LY96	0.000417488	0.82562785	0.242	0.167	1
HSF1	0.000417488	0.415407484	0.129	0.125	1
TMOD3	0.000417724	0.269854587	0.194	0.167	1
DUSP11	0.00041775	0.607191954	0.226	0.208	1
ESCO1	0.000432937	1.088688574	0.258	0.292	1
STXBP2	0.000432937	0.668667413	0.242	0.417	1
KAT6A	0.000449086	0.772815267	0.226	0.083	1
SERTAD2	0.000449198	0.388820534	0.274	0.208	1
PBXIP1	0.000449198	0.950443425	0.129	0	1
CBR1	0.000464125	0.82968751	0.113	0.25	1
BFAR	0.000465709	0.635017109	0.194	0.167	1
CHD9	0.000465738	-0.418251596	0.29	0.167	1
ANKRD13A	0.000479284	1.274128916	0.145	0.333	1
GALT	0.000481181	0.29441008	0.113	0.333	1
SNAPC5	0.000481804	0.446632896	0.113	0.125	1
NINJ1	0.00048225	0.733330094	0.226	0.208	1
SNN	0.000482815	0.272963929	0.097	0.125	1
PPIL3	0.000482815	-0.728179773	0.032	0.333	1
RASAL3	0.000482815	1.042034994	0.194	0.125	1
CUEDC2	0.000497964	1.1414587	0.145	0.542	1
MRPS28	0.00049882	0.79687119	0.161	0.083	1
ABTB1	0.000500505	0.820937958	0.226	0.125	1
TIMM9	0.000500536	0.290022083	0.226	0.167	1
METTL7A	0.000518197	0.294719034	0.113	0.583	1
APH1B	0.000518514	0.353035733	0.065	0.167	1
SLC50A1	0.000518703	0.882021376	0.226	0.5	1
NUP98	0.000518798	0.587341773	0.258	0.125	1
ISG20L2	0.00051883	0.349530171	0.145	0.208	1
CRLF3	0.00051883	0.259830281	0.226	0.167	1
CUTC	0.000536605	0.335142882	0.097	0.417	1
ST6GAL1	0.000537419	0.752190887	0.258	0.292	1
NFAT5	0.000537615	1.050760864	0.258	0.25	1
DTWD1	0.000537615	0.262253366	0.048	0.25	1
SNRPA	0.000537615	0.378369737	0.242	0.25	1
CLDND1	0.000537615	0.476477576	0.274	0.167	1
ERGIC2	0.000537713	1.127452168	0.258	0.167	1
GFM1	0.000549939	1.077257243	0.226	0.292	1
CFAP20	0.00055663	0.511180917	0.129	0.25	1
SEC23A	0.00055663	0.542655193	0.081	0.25	1
HPS4	0.000557269	0.686386937	0.242	0.25	1
CDK13	0.000577381	0.63228501	0.177	0.167	1
RAB5B	0.00059642	0.712889486	0.129	0.25	1
MRPL49	0.000597704	0.516940723	0.113	0.167	1
BMS1	0.000597704	0.308138097	0.081	0.417	1
YPEL2	0.000598061	0.616607943	0.081	0.167	1
PRMT9	0.000598383	0.427598259	0.274	0.208	1
SPPL2A	0.000618731	0.329112676	0.145	0.25	1
PPP1R15B	0.000619651	0.441749957	0.242	0.292	1
TMEM208	0.000620019	-0.482019034	0.258	0.292	1
NIN	0.000620019	1.253185851	0.21	0.292	1
FAM204A	0.000642192	0.47585719	0.274	0.125	1
EPRS	0.000642306	0.862886032	0.21	0.125	1
BAG5	0.000642306	0.438395146	0.161	0.167	1
AFF3	0.000642344	-0.658507495	0.274	0.208	1
BSDC1	0.000642344	0.525381585	0.242	0.125	1
ATF5	0.000688447	0.521286143	0.081	0.417	1
URM1	0.000688447	0.89555799	0.097	0.333	1
NUP160	0.000688447	0.522443206	0.081	0.125	1
SLC35A4	0.000688447	0.737450187	0.097	0.167	1
BCCIP	0.000689253	0.416657387	0.21	0.167	1
RNF114	0.000689253	0.283230937	0.258	0.083	1
GNB1	0.000710402	0.543095578	0.145	0.375	1
SP1	0.000713053	0.258188124	0.081	0.208	1
EAPP	0.000713717	0.489785579	0.274	0.208	1
ZCCHC7	0.000713842	0.449206167	0.242	0.083	1
RSF1	0.000713842	-0.532369342	0.339	0.458	1
PRPS1	0.000713883	0.738370422	0.21	0.083	1
EED	0.000738475	0.663988604	0.097	0.167	1
IK	0.000738902	0.411842571	0.258	0.125	1
UBTF	0.000739159	0.462058459	0.065	0.125	1
LGMN	0.000739287	-0.747464135	0.048	0.208	1
VCPKMT	0.00073933	0.27237482	0.242	0.167	1
AP1S2	0.00073933	-0.382843235	0.177	0.292	1
RAP1GDS1	0.000760343	1.114839278	0.177	0.125	1
AAGAB	0.000764076	0.500494239	0.129	0.5	1
STIP1	0.000765572	0.363627044	0.274	0.167	1
DNAAF2	0.000765572	-0.361381143	0.177	0.333	1
TACC1	0.000765616	0.778577312	0.242	0.417	1
HPS1	0.000791182	0.42611422	0.21	0.375	1
SLC36A4	0.000792315	0.500657014	0.081	0.125	1
PARVG	0.000792768	-0.380250155	0.129	0.25	1
DNTTIP1	0.000792768	0.449997911	0.161	0.208	1
TCIRG1	0.000815219	0.601797849	0.274	0.708	1
G2E3	0.000819878	0.835257738	0.081	0.292	1
RNF2	0.000820812	-0.569050166	0.016	0.208	1
BCL3	0.000847083	0.702497131	0.113	0.292	1
CPSF6	0.000849581	0.65945485	0.226	0.083	1
TCL1A	0.000849726	0.374551908	0.161	0.083	1
FAM172A	0.000849726	0.849686048	0.177	0.083	1
BCL10	0.00087691	0.701408556	0.274	0.417	1
ATG16L2	0.000877948	0.99199438	0.145	0.25	1
FPGS	0.000879185	0.467492724	0.113	0.208	1
TCF4	0.000879483	-0.262501848	0.323	0.417	1
DNAJC4	0.000879681	0.626565679	0.226	0.167	1
ORMDL2	0.000908777	0.766188511	0.129	0.083	1
MNAT1	0.000909541	0.507976239	0.081	0.208	1
SPRYD7	0.000910051	0.420505323	0.065	0.125	1
FBXW7	0.000974817	0.757060464	0.065	0.125	1
B3GAT3	0.000975141	0.391875601	0.177	0.208	1
PHTF2	0.000975141	0.675779704	0.274	0.167	1
DPH3	0.000975357	0.418001121	0.242	0.25	1
PRPF8	0.00100911	0.316859699	0.29	0.167	1
RAP2C	0.001041199	0.37983007	0.161	0.375	1
NSMCE4A	0.001077299	1.022825816	0.161	0.083	1
DUSP22	0.001080534	0.820926662	0.145	0.083	1
WDR70	0.001116732	0.56956347	0.081	0.208	1
EIF2B5	0.001117337	0.709508555	0.113	0.083	1
CNOT8	0.001117882	1.275769307	0.177	0.083	1
SLC38A2	0.001117943	-0.277903704	0.258	0.333	1
CDC42EP3	0.001154303	0.265635737	0.306	0.25	1
VPS37B	0.001156421	0.378203562	0.29	0.125	1
CASP8AP2	0.001156421	0.49335354	0.097	0.167	1
RAB21	0.001156421	-0.349449038	0.048	0.375	1
CHTOP	0.001156421	0.63639033	0.145	0.083	1
PWP1	0.001156483	-0.514599235	0.226	0.292	1
HSD17B12	0.001195607	0.709080072	0.113	0.083	1
RASSF5	0.001196248	0.579616848	0.242	0.25	1
S1PR1	0.001235955	0.987768895	0.274	0.083	1
PLAG1	0.001235955	0.512607612	0.081	0.417	1
SLU7	0.00123701	0.381723633	0.145	0.167	1
AP1G2	0.001237207	0.827343653	0.226	0.167	1
MGAT4A	0.001278238	0.58832596	0.29	0.458	1
NFX1	0.001278238	0.819742564	0.145	0.208	1
RABEP1	0.001279594	-0.259731379	0.177	0.208	1
CABIN1	0.001319346	0.66055361	0.113	0.375	1
CCDC124	0.001319346	0.743053272	0.226	0.333	1
CD46	0.001323178	0.309848466	0.161	0.167	1
DBI	0.001367985	-0.440771701	0.387	0.5	1
MAP2K3	0.001368272	0.54846883	0.21	0.25	1
HSPA6	0.00139372	0.666894439	0.258	0.292	1
HOPX	0.001405875	1.136712993	0.258	0.208	1
MAP4	0.001414705	0.514633131	0.29	0.25	1
MPV17	0.00145351	0.38124749	0.145	0.458	1
GNPTG	0.001459936	0.617874324	0.161	0.583	1
MAD2L2	0.001461072	0.496664991	0.145	0.25	1
RGS10	0.001461072	0.736956748	0.29	0.417	1
MAGOHB	0.00146183	-0.44250371	0.065	0.292	1
ZNF322	0.001462285	0.56834028	0.048	0.208	1
OARD1	0.001462285	0.570949018	0.161	0.083	1
POLM	0.001462285	0.430942166	0.097	0.167	1
ZBTB20	0.001462512	-0.260038668	0.226	0.375	1
KCNN4	0.001502628	0.507865245	0.177	0.333	1
OGG1	0.001511181	-0.418841035	0.065	0.208	1
NUTM2B-AS1	0.001511648	1.317582666	0.194	0.25	1
PDRG1	0.001511882	0.37369678	0.032	0.125	1
KCTD5	0.001560062	0.961025722	0.097	0.333	1
CAMTA1	0.001562543	0.44976589	0.258	0.375	1
PPA1	0.001562783	-0.289932314	0.21	0.375	1
PAFAH1B2	0.001615011	0.454807604	0.048	0.125	1
RBM22	0.001615011	0.688676388	0.177	0.083	1
ARID1A	0.001615258	0.576072792	0.226	0.5	1
KRR1	0.001615258	0.471021034	0.29	0.167	1
SUPT20H	0.001666476	0.475444026	0.161	0.25	1
APOBEC3C	0.001668589	0.483437073	0.194	0.25	1
KRCC1	0.001669097	0.455177679	0.194	0.25	1
ASH1L	0.00166935	0.455643315	0.258	0.333	1
MEA1	0.001669435	0.775008353	0.29	0.5	1
ARL8B	0.001669435	0.735866004	0.177	0.042	1
RICTOR	0.001714783	0.443088514	0.161	0.25	1
EIF2B1	0.001714783	0.487216004	0.161	0.25	1
PSMD12	0.001722152	0.922496495	0.226	0.417	1
ANKRA2	0.001722152	0.892875226	0.129	0.083	1
CDK4	0.001725192	0.25587708	0.274	0.583	1
ZNF292	0.001780871	0.610507867	0.29	0.375	1
MCTP2	0.001781764	1.115729446	0.129	0.042	1
LCOR	0.001834181	1.259712178	0.145	0.292	1
SART3	0.001899602	0.635515418	0.097	0.25	1
VPS26A	0.001899602	0.665073179	0.161	0.5	1
MCM3	0.001901015	0.326017503	0.097	0.333	1
SLC25A26	0.001902522	0.317569604	0.161	0.25	1
MIDN	0.001902522	0.290224327	0.306	0.167	1
AAMP	0.001964805	-0.447710142	0.065	0.417	1
RIF1	0.001964805	0.765148029	0.113	0.083	1
ARHGAP30	0.001964805	0.329145773	0.306	0.5	1
SLC39A10	0.002027072	0.442553054	0.097	0.417	1
SRPK2	0.002029555	0.570212418	0.242	0.333	1
NIPAL3	0.002030449	0.379423124	0.032	0.208	1
SLC7A7	0.002088715	0.281784484	0.129	0.583	1
PRMT2	0.002096869	0.453976301	0.306	0.167	1
FKBP2	0.002097176	-0.273086613	0.177	0.417	1
NME1	0.002097176	-0.915693671	0.032	0.333	1
PRR34-AS1	0.002097176	0.25121637	0.048	0.25	1
ZNF581	0.002097176	0.448431688	0.21	0.167	1
TXNDC17	0.002097278	-0.726021764	0.194	0.292	1
COX7C	0.002097278	-0.737871305	0.371	0.708	1
ZNF92	0.002097278	1.130823693	0.21	0.083	1
GTF3C6	0.002097278	-0.278677701	0.274	0.458	1
TOX4	0.002097278	0.265099968	0.194	0.125	1
ZC3H7A	0.002219097	1.101640299	0.21	0.25	1
LPAR5	0.002230787	0.727983965	0.113	0.083	1
UTY	0.0022367	0.824635101	0.274	0.25	1
ORAI1	0.0022367	-0.736676846	0.032	0.208	1
SPIDR	0.002303536	1.126244439	0.113	0.167	1
COG2	0.002375284	0.828395603	0.129	0.333	1
TMEM101	0.002375284	0.91271634	0.129	0.333	1
MRPL30	0.00238083	0.374131443	0.097	0.292	1
CD70	0.002382529	0.408236024	0.113	0.208	1
PRKCE	0.002382529	0.797620319	0.081	0.333	1
AKAP17A	0.002382529	0.858553167	0.145	0.167	1
SLC30A9	0.002384343	0.669764426	0.113	0.167	1
TPGS2	0.002455593	1.110514896	0.129	0.375	1
CD68	0.002458033	0.378504888	0.097	0.292	1
FRA10AC1	0.002458033	0.350608676	0.145	0.333	1
PDCD6IP	0.002461988	-0.292042553	0.339	0.25	1
GCA	0.002462104	0.260904612	0.129	0.208	1
METTL21A	0.002462104	0.407984287	0.194	0.125	1
CWC22	0.002462104	0.785882432	0.274	0.25	1
ZBTB44	0.002527392	0.65727597	0.161	0.292	1
TARSL2	0.002537521	0.571663114	0.097	0.208	1
KLF10	0.002540505	1.132389158	0.29	0.125	1
DNAJC17	0.002540505	0.328825248	0.065	0.292	1
MRFAP1L1	0.002541221	1.175485876	0.161	0.083	1
SS18	0.002541221	0.421021319	0.177	0.167	1
HEXB	0.002541221	0.813985072	0.161	0.208	1
TUBA1A	0.002541579	-0.355043417	0.274	0.25	1
PPP2R5E	0.002541699	0.746206509	0.21	0.25	1
PSMB4	0.002541699	0.513342138	0.21	0.042	1
VDAC1	0.002622415	0.553097829	0.242	0.125	1
CHMP1B	0.002623641	-0.453527511	0.226	0.292	1
RTN3	0.002697441	0.497960755	0.145	0.375	1
THEMIS2	0.002703592	0.960824811	0.258	0.583	1
FAM126B	0.002703592	0.393681376	0.113	0.25	1
POLR2D	0.002705477	0.489210121	0.081	0.125	1
NAA50	0.002705477	0.541974055	0.29	0.167	1
POLD2	0.002707488	-0.525921447	0.048	0.458	1
TAP1	0.002707488	0.477029538	0.306	0.208	1
BIN2	0.002707488	0.930480162	0.29	0.167	1
HIF1A	0.002707865	-0.268208139	0.371	0.292	1
ACADVL	0.002707865	-0.3835017	0.129	0.292	1
CITED2	0.002707991	0.276071377	0.242	0.208	1
TMEM123	0.002707991	-0.48462683	0.21	0.25	1
PAN3	0.002787593	0.25909121	0.113	0.458	1
BAG2	0.002790299	0.406885708	0.129	0.25	1
SHOC2	0.002793522	0.386673549	0.29	0.125	1
CDK11B	0.002876763	0.696544069	0.21	0.333	1
C16orf91	0.002881522	0.320762873	0.081	0.25	1
EMG1	0.002881522	0.283389821	0.081	0.375	1
LINC01215	0.002884036	0.782635643	0.194	0.208	1
CCR6	0.002968529	1.174520137	0.129	0.083	1
PYCR2	0.002973411	0.941912096	0.113	0.292	1
PHF1	0.002975582	0.791909129	0.29	0.208	1
CCT6A	0.002975582	-0.30095921	0.371	0.292	1
SPTAN1	0.002975989	0.818869629	0.194	0.167	1
C21orf2	0.002975989	-0.373227648	0.032	0.208	1
MRPS6	0.003062959	0.653305499	0.258	0.458	1
NCR3	0.00307061	0.633861436	0.242	0.125	1
RPS27L	0.00307075	-0.442349657	0.403	0.667	1
PHF6	0.00307075	0.486260695	0.145	0.125	1
ATF7IP	0.00307075	-0.541046854	0.323	0.125	1
COX20	0.00316811	0.558749727	0.258	0.208	1
PRMT1	0.00316811	0.270926776	0.323	0.208	1
YIF1A	0.003244173	0.504573827	0.21	0.292	1
GLUL	0.003255992	0.677966998	0.194	0.292	1
SNX4	0.00326813	-0.387812644	0.032	0.292	1
RBBP4	0.00326813	0.289564201	0.177	0.125	1
YBEY	0.003358725	0.30611765	0.129	0.208	1
PTER	0.003369819	-0.3200444	0.065	0.208	1
BDP1	0.00337072	0.396117929	0.29	0.25	1
CBWD5	0.00337117	0.608139922	0.242	0.167	1
CWC27	0.003474236	0.601855563	0.081	0.375	1
SEC11C	0.003475775	0.592458725	0.29	0.458	1
C16orf87	0.003475775	0.735391332	0.129	0.25	1
CST3	0.003580812	-0.448797183	0.097	0.5	1
BORCS7	0.003584753	0.786752199	0.274	0.083	1
MRPL45	0.003586173	0.694932313	0.129	0.542	1
MVP	0.00368488	0.744408917	0.129	0.25	1
TRIM33	0.003692792	0.385425805	0.097	0.25	1
ZNF652	0.003697802	-0.409377852	0.048	0.333	1
NUB1	0.003698448	0.500268882	0.242	0.083	1
GRINA	0.003786457	0.585002577	0.161	0.708	1
PRKAA1	0.003799838	0.647586546	0.129	0.167	1
SPOCK2	0.003807946	0.875772071	0.306	0.375	1
TTC39C	0.003807946	0.49230405	0.097	0.417	1
RAB1B	0.003807946	0.990115813	0.306	0.125	1
PMPCB	0.00381043	0.786046464	0.306	0.208	1
CNPPD1	0.00381043	0.701416899	0.306	0.25	1
FLNA	0.003922792	0.518465552	0.323	0.583	1
MRPL44	0.003922792	-0.274235294	0.129	0.333	1
DNTTIP2	0.003930598	0.878748141	0.274	0.042	1
SNX27	0.003930598	0.254770151	0.065	0.25	1
TRAF4	0.003932126	-0.265785158	0.032	0.167	1
PHC3	0.003932126	0.269875904	0.323	0.125	1
VPS4B	0.003932296	0.277682839	0.161	0.125	1
DCP2	0.003932296	0.638405635	0.226	0.292	1
ANXA4	0.004044447	0.291936487	0.226	0.542	1
TBL1XR1	0.004048097	0.303806806	0.145	0.583	1
XAB2	0.004050706	0.983970474	0.129	0.5	1
HES1	0.004052445	0.72223793	0.065	0.25	1
TRAF3	0.004052445	0.449960881	0.129	0.333	1
BANP	0.004053489	0.742324501	0.145	0.292	1
HECTD1	0.004054011	0.898630584	0.274	0.083	1
LYPLA2	0.004173256	0.670290412	0.177	0.25	1
CD99	0.004175929	0.979682681	0.694	0.25	1
CISD2	0.004175929	0.305405517	0.161	0.292	1
UVRAG	0.004179494	-0.352117516	0.339	0.292	1
EPSTI1	0.004308307	0.676550161	0.129	0.167	1
SAFB2	0.004308307	0.298189276	0.177	0.208	1
SRPRB	0.004425008	0.480257288	0.161	0.583	1
GPN3	0.004430238	0.786052051	0.113	0.208	1
PIK3AP1	0.004436968	0.432064851	0.21	0.167	1
NUCB1	0.004438838	0.404730705	0.323	0.375	1
POMP	0.004440709	-0.871550706	0.468	0.542	1
TMUB1	0.004440709	0.597369225	0.274	0.083	1
JADE2	0.004560706	1.333681925	0.145	0.167	1
WDR61	0.004560706	0.986066377	0.129	0.083	1
DALRD3	0.004566063	1.031645919	0.113	0.417	1
SUCLG1	0.004566063	0.292402452	0.177	0.5	1
CASP8	0.004570083	1.033817952	0.194	0.167	1
DTD1	0.004570083	-0.306931868	0.097	0.292	1
MYCBP	0.004574872	0.289033173	0.097	0.208	1
TMEM9B	0.004576596	0.483753628	0.258	0.208	1
OS9	0.004576788	0.422405294	0.258	0.167	1
BDH2	0.004705649	0.548417667	0.129	0.167	1
PCBP1	0.004705649	0.634460515	0.29	0.375	1
OMA1	0.004705649	0.501209497	0.113	0.208	1
APEX1	0.004716436	-0.464974725	0.323	0.333	1
RBM17	0.004716436	0.328227469	0.258	0.125	1
WDR73	0.004716633	-0.3078663	0.016	0.167	1
ZBP1	0.004816232	0.971157973	0.177	0.167	1
SVBP	0.004856316	0.532800558	0.129	0.125	1
GNPTAB	0.004858325	0.98294073	0.145	0.042	1
WAS	0.004860133	0.366142949	0.306	0.208	1
GSTP1	0.004860334	-0.994085277	0.258	0.375	1
MPG	0.004860334	0.426628569	0.323	0.083	1
VPS72	0.004996469	0.517385582	0.129	0.208	1
ASF1A	0.005000786	0.574003092	0.097	0.167	1
DERA	0.005000786	0.711769027	0.097	0.125	1
DARS	0.005003871	0.716066185	0.323	0.208	1
PPIG	0.005007162	-0.445648195	0.371	0.333	1
CTSC	0.00515231	0.40633659	0.306	0.208	1
LRBA	0.00515231	1.08481199	0.194	0.042	1
DNAJC10	0.005159681	-0.491674635	0.161	0.292	1
NEK6	0.005268183	0.706452143	0.194	0.333	1
CYB5R3	0.00531336	0.580959382	0.323	0.5	1
MAGEH1	0.005315301	0.392496782	0.032	0.125	1
MTSS1	0.005474707	1.073188259	0.306	0.083	1
SMAD2	0.005475369	0.485430617	0.032	0.125	1
RTN4	0.00547559	-0.33599786	0.29	0.333	1
GOLGA4	0.005637743	0.304361274	0.274	0.333	1
RCAN3	0.005639099	0.595680213	0.048	0.125	1
RAB30	0.005639099	0.597847767	0.306	0.125	1
NAGK	0.005640003	0.444322923	0.242	0.125	1
WDR13	0.005781142	0.997782978	0.145	0.5	1
ZNF331	0.005795914	0.748291258	0.258	0.292	1
FAM110A	0.005800765	1.021348161	0.097	0.125	1
PHB	0.005800765	0.259636421	0.177	0.5	1
TBCC	0.005804232	0.638917314	0.145	0.167	1
TPM4	0.005806544	-0.36071165	0.242	0.417	1
DCP1A	0.005808625	0.46868545	0.145	0.167	1
PLEKHA2	0.005808856	0.536196658	0.177	0.333	1
SDHAF2	0.005953894	0.384498401	0.145	0.292	1
FAM3C	0.005977522	0.56653724	0.274	0.208	1
BORCS5	0.005979887	0.327101814	0.242	0.208	1
CYB5R4	0.005982253	0.537777023	0.194	0.208	1
MTHFS	0.006155459	0.298693068	0.081	0.333	1
LYN	0.00615788	0.535166549	0.194	0.125	1
PRDX6	0.006160058	-0.316021309	0.452	0.5	1
NCOA4	0.006160301	0.758435343	0.161	0.208	1
MTERF4	0.006343106	0.744843494	0.177	0.292	1
TLE3	0.006516597	0.320727871	0.145	0.167	1
PSMC6	0.006525712	0.729949773	0.242	0.167	1
SYK	0.006528245	0.423604106	0.306	0.333	1
FAM217B	0.006529765	-0.271657518	0.048	0.333	1
CDV3	0.006701679	0.439382828	0.145	0.583	1
CCR7	0.00672084	0.602271556	0.29	0.333	1
STX3	0.006723172	-0.488309645	0.032	0.417	1
PPIH	0.006723172	0.641306771	0.194	0.167	1
HMOX1	0.006906341	0.714514664	0.145	0.125	1
CDS2	0.006918526	0.415184037	0.177	0.167	1
PIP5K1A	0.006920116	0.676270297	0.065	0.125	1
FGFR1OP2	0.006921177	-0.321878394	0.403	0.292	1
DNPH1	0.007121421	0.405125922	0.226	0.292	1
QARS	0.00712386	0.456891766	0.081	0.167	1
C22orf39	0.00712386	0.298081856	0.113	0.25	1
LMAN1	0.007124131	0.253024376	0.226	0.292	1
COBLL1	0.007331304	0.759994415	0.323	0.042	1
PEF1	0.007331304	1.532912773	0.29	0.125	1
PHYKPL	0.007332412	-0.420726655	0.177	0.292	1
PPP1CC	0.007545007	1.032448665	0.387	0.208	1
TMX4	0.007546141	0.410490218	0.339	0.25	1
CENPH	0.007759645	0.659833598	0.081	0.208	1
HSD17B4	0.007764279	0.304202149	0.048	0.208	1
ARL4A	0.007990428	-0.609062633	0.306	0.167	1
MYC	0.008215186	0.584823011	0.145	0.292	1
CTDSP2	0.008220028	-0.509666417	0.048	0.25	1
LARP7	0.008220936	0.397866014	0.242	0.333	1
EIF2A	0.00845676	-0.277355947	0.403	0.333	1
PPP1R10	0.008457688	0.273970749	0.161	0.292	1
CBWD2	0.008457997	0.812415871	0.258	0.167	1
ZNF511	0.008683141	0.575714885	0.113	0.208	1
FAM162A	0.00869957	0.749237901	0.258	0.25	1
AHCY	0.008938583	0.55765469	0.113	0.417	1
DENND5B	0.008938583	0.577984327	0.097	0.417	1
CHMP7	0.008949561	0.691951561	0.161	0.083	1
MED4	0.008949884	-0.261178093	0.21	0.375	1
VPS36	0.009198682	0.990518509	0.226	0.125	1
1-Sep	0.009204951	0.758666499	0.355	0.125	1
TMEM251	0.009205281	-0.374655169	0.016	0.167	1
TOP2B	0.009466825	0.633930685	0.097	0.167	1
TIAL1	0.010009535	0.392734827	0.29	0.208	1
CHMP4A	0.01001059	1.197645688	0.258	0.167	1
MED31	0.010010941	0.553344604	0.194	0.125	1
DAAM1	0.010262978	0.635060242	0.194	0.208	1
LIMS1	0.010273022	0.976975991	0.161	0.458	1
RRAGC	0.010273022	0.479032519	0.129	0.292	1
DUS2	0.010280558	0.422588757	0.097	0.208	1
PSMB8-AS1	0.010291688	0.342003079	0.226	0.208	1
PPP4R3B	0.010293125	1.19525338	0.274	0	1
MYO1G	0.010575033	0.998113101	0.29	0.125	1
GINM1	0.010580899	0.487072577	0.194	0.167	1
CYTH4	0.010871327	0.398253386	0.161	0.25	1
VPS8	0.010871327	0.278008633	0.081	0.167	1
USP48	0.01087507	0.899543002	0.177	0.167	1
SPOP	0.010877316	0.788053806	0.177	0.25	1
ITGA4	0.011181091	0.489338245	0.339	0.458	1
PRKCSH	0.011182238	0.55153855	0.21	0.125	1
RGP1	0.011493938	-0.358830557	0.016	0.208	1
GYPC	0.011493938	0.572171825	0.323	0.083	1
CHTF8	0.01179063	0.514185414	0.129	0.417	1
LRMP	0.01180496	0.471315327	0.258	0.292	1
SEL1L3	0.012125514	0.347946263	0.339	0.25	1
TSPAN3	0.012802679	0.496787392	0.274	0.292	1
COA6	0.012815795	0.784340439	0.145	0.208	1
PGLS	0.012817488	-0.396691549	0.194	0.375	1
NSUN5	0.013160122	0.5454602	0.113	0.208	1
NFE2L2	0.013164439	0.380058782	0.323	0.292	1
CEBPB	0.013164439	-0.349723831	0.097	0.292	1
LEMD2	0.013528069	0.392679888	0.032	0.125	1
ASXL1	0.013881197	0.267684205	0.113	0.125	1
SMG1	0.013892426	0.722684665	0.339	0.458	1
SAP30BP	0.013895122	0.495673707	0.258	0.25	1
SETX	0.01389647	0.733718774	0.339	0.208	1
CTBS	0.01389647	0.292457752	0.242	0.375	1
TXNDC12	0.014258123	0.680940713	0.177	0.292	1
RPP21	0.014264994	0.820693567	0.339	0.333	1
KLHDC2	0.014264994	0.299255763	0.129	0.208	1
BCL2A1	0.014269576	0.283631397	0.355	0.292	1
NUP58	0.014269576	0.372636784	0.339	0.208	1
H2AFZ	0.0142737	-0.550762319	0.323	0.5	1
HIBCH	0.014651057	0.680199848	0.113	0.167	1
SYNE2	0.014659935	0.374189175	0.129	0.167	1
HIST1H2BN	0.0150463	0.874170661	0.081	0.208	1
LEPROTL1	0.015450905	0.575425575	0.226	0.208	1
SPINT2	0.015458678	0.250641416	0.371	0.208	1
CAST	0.015460135	0.552371409	0.371	0.208	1
HMGN3	0.015460621	-0.278728852	0.403	0.417	1
APBB1IP	0.01587298	0.611334147	0.355	0.375	1
MRPS23	0.01587298	-0.287249415	0.048	0.25	1
HNRNPD	0.015874961	0.348093932	0.274	0.125	1
HSH2D	0.016293985	1.209838132	0.323	0.083	1
CD164	0.016297014	0.50039861	0.355	0.292	1
SURF1	0.016715021	0.629562229	0.161	0.208	1
CAMK1D	0.016715021	0.905408314	0.194	0.167	1
MDM4	0.016722738	0.911288648	0.21	0.083	1
IL10RA	0.016727883	0.250451442	0.371	0.5	1
TRIM4	0.016727883	-0.269958041	0.065	0.208	1
ATF4	0.01673097	0.252981465	0.387	0.292	1
E4F1	0.016732514	0.372396772	0.032	0.292	1
CHI3L2	0.016733029	-0.302541989	0.048	0.167	1
C19orf48	0.017166649	0.582315036	0.097	0.125	1
CYTH1	0.017175039	0.560248361	0.355	0.333	1
CYBB	0.017177137	0.261453128	0.274	0.083	1
ZNF131	0.017620864	0.628901362	0.161	0.167	1
EIF1AY	0.017626207	0.547022618	0.355	0.208	1
RNPEPL1	0.017629414	0.418244065	0.048	0.208	1
RPLP0	0.017631551	-0.508530959	0.323	0.542	1
HADHB	0.017631551	0.706617226	0.194	0.458	1
SCIMP	0.018050748	0.571957227	0.242	0.583	1
BNIP2	0.01809429	0.716321437	0.355	0.208	1
CIITA	0.018095924	0.260434892	0.21	0.208	1
HIPK2	0.018480634	0.372302745	0.161	0.667	1
RPF1	0.018552673	0.39461231	0.097	0.125	1
SMPD4	0.018552673	0.254751963	0.097	0.458	1
TRUB1	0.018572087	-0.326241042	0.016	0.208	1
ECHS1	0.019056347	0.317111212	0.129	0.333	1
ARL2BP	0.019056347	-0.402335399	0.161	0.375	1
SYS1	0.019058042	0.368466169	0.339	0.208	1
KRIT1	0.01953609	0.387582101	0.145	0.25	1
CD19	0.019555659	0.355101208	0.387	0.208	1
IFT20	0.020032351	0.839445852	0.145	0.125	1
ARL4C	0.020053449	0.375943805	0.161	0.125	1
NRBP1	0.020064588	0.595712291	0.258	0.25	1
QDPR	0.020564742	0.401663276	0.097	0.292	1
HARS	0.020573695	0.700212651	0.161	0.292	1
OXR1	0.020585635	0.489405488	0.161	0.292	1
FNIP1	0.020585635	-0.487695653	0.226	0.208	1
ID2	0.021083794	-0.253425102	0.177	0.333	1
DNPEP	0.02111175	0.294813014	0.097	0.292	1
HSPH1	0.02164031	0.402396035	0.306	0.208	1
CD79B	0.021655781	1.165026923	0.419	0.292	1
FLOT2	0.021659494	0.787030622	0.21	0.292	1
PDIA4	0.022165366	0.395413674	0.161	0.292	1
MRPL18	0.022182997	0.663770209	0.355	0.208	1
HEXDC	0.022211974	0.474354733	0.065	0.125	1
EPB41L4A-AS1	0.022218275	-0.377879772	0.387	0.208	1
SNHG15	0.022218275	-0.559958339	0.387	0.208	1
TOB2	0.022780549	0.762495936	0.113	0.083	1
POP5	0.022784397	0.403859337	0.081	0.292	1
NFKB2	0.022786321	0.699403769	0.339	0.083	1
IGHA2	0.023289961	0.948509447	0.21	0.167	1
FOXN3	0.023365644	1.189171717	0.274	0.25	1
LYPLAL1	0.023367602	0.475468147	0.226	0.208	1
RASGEF1B	0.023367602	-0.624102202	0.403	0.292	1
CETN2	0.023959719	-0.338004438	0.048	0.333	1
DEGS1	0.023961712	0.289857874	0.274	0.25	1
UBB	0.023961712	-0.307957807	0.355	0.625	1
ETHE1	0.024488473	0.642264381	0.145	0.5	1
PPP2R5C	0.024531704	0.990258106	0.323	0.125	1
CORO1C	0.024531704	0.566073003	0.129	0.167	1
ARHGAP25	0.024556033	0.554029332	0.355	0.208	1
PRPF6	0.024562793	0.723055029	0.29	0.208	1
HIBADH	0.024566849	-0.464351034	0.048	0.25	1
MT-ND1	0.024569553	-0.589573426	0.484	0.625	1
FCRL1	0.024569553	0.48772907	0.323	0.125	1
MLLT6	0.025151505	1.061444938	0.161	0.167	1
ZSWIM7	0.025187264	0.697655893	0.145	0.125	1
PHF14	0.025187264	0.49937774	0.177	0.375	1
HSPA4	0.025189328	0.39003879	0.355	0.25	1
GAPT	0.025189328	0.468879373	0.274	0.167	1
ZFR	0.025821195	0.667551211	0.177	0.083	1
COA5	0.025823295	0.772540693	0.161	0.167	1
HEBP1	0.026464607	0.448565082	0.065	0.292	1
PFKL	0.026471013	0.60113651	0.177	0.25	1
CAMLG	0.026471725	0.357887148	0.387	0.292	1
THRAP3	0.026471725	0.383447189	0.371	0.333	1
DYNLT1	0.027108107	0.320015253	0.242	0.375	1
TMED10	0.027130548	0.463138161	0.339	0.25	1
USP34	0.027130548	1.228179159	0.29	0.167	1
BAZ1A	0.027802028	0.252096998	0.274	0.208	1
CNTRL	0.027806446	0.470527263	0.242	0.292	1
AREG	0.027808655	0.282707418	0.29	0.125	1
MICU2	0.028484834	0.957113478	0.339	0.458	1
CREM	0.028484834	-0.304699947	0.403	0.417	1
ITGB1BP1	0.028492321	0.797389859	0.113	0.042	1
PARP10	0.028492321	0.423868118	0.065	0.125	1
HP1BP3	0.028496813	0.369005657	0.29	0.208	1
BCAS2	0.028499059	-0.461123436	0.29	0.292	1
SIPA1	0.028499808	0.995198254	0.161	0.208	1
CAP1	0.029162314	0.49572841	0.371	0.417	1
PLGRKT	0.029162314	0.458926242	0.113	0.208	1
BUB3	0.029917291	0.251478706	0.339	0.333	1
FAM177A1	0.029921935	0.259019992	0.403	0.292	1
ILKAP	0.030632798	0.622996402	0.113	0.333	1
ETFA	0.030657186	0.330584627	0.355	0.333	1
SNAP23	0.030657186	0.322224778	0.226	0.167	1
PUF60	0.031407898	0.786309389	0.306	0.125	1
PLD4	0.031410297	-0.417463947	0.081	0.208	1
DDIT3	0.031410297	-0.526075869	0.339	0.333	1
RNF126	0.031410297	0.883284042	0.226	0.25	1
SERTAD3	0.032043546	0.723216336	0.161	0.208	1
HDAC1	0.032176765	0.761453824	0.226	0.083	1
APBA3	0.032943512	0.495451459	0.081	0.167	1
UTP4	0.032956726	-0.321671106	0.048	0.375	1
MRPS5	0.032959204	0.366684428	0.097	0.125	1
SHISA5	0.032959204	0.70475919	0.242	0.125	1
ACADM	0.033688236	0.679643441	0.129	0.167	1
TRMT13	0.03374193	0.841620321	0.081	0.333	1
TAF1D	0.033758714	-0.575323337	0.29	0.333	1
SUSD6	0.035357325	0.502763514	0.129	0.375	1
FARSB	0.0353885	0.303351471	0.081	0.208	1
DCTN3	0.035397161	0.32039733	0.371	0.25	1
TARDBP	0.035404957	0.617952405	0.145	0.125	1
NDUFAF2	0.036223986	0.774525126	0.097	0.125	1
SASH3	0.036237181	0.691657587	0.355	0.167	1
ISG15	0.036237181	0.360489879	0.242	0.25	1
KLHL7	0.036237181	1.016114121	0.097	0.125	1
H3F3B	0.036251258	-0.32012494	0.339	0.458	1
TRIM13	0.036251258	0.283084507	0.177	0.208	1
RFK	0.037112085	-0.265326644	0.065	0.167	1
HUS1	0.037112085	0.692915882	0.113	0.292	1
RUNX3	0.037117446	0.412080888	0.145	0.333	1
CDC37	0.037117446	-0.36335743	0.452	0.292	1
PPIE	0.037986676	0.446599066	0.113	0.167	1
MPZL1	0.037986676	0.349796999	0.081	0.458	1
CYCS	0.038003916	-0.731520392	0.468	0.583	1
SNHG12	0.038003916	0.975568885	0.355	0.167	1
REL	0.038004824	0.272178388	0.306	0.125	1
RABGAP1L	0.038902774	0.872036447	0.355	0.042	1
MRPS31	0.038902774	-0.284802578	0.065	0.208	1
AKAP9	0.038906459	-0.484982753	0.274	0.333	1
DAPP1	0.039807492	0.525600826	0.371	0.25	1
SNRNP70	0.039816847	0.87217354	0.258	0.125	1
SAMM50	0.039816847	0.778242005	0.21	0.125	1
NGLY1	0.039822459	0.978347955	0.355	0.208	1
POLR1C	0.039822459	0.27297549	0.048	0.125	1
RAB37	0.039822459	0.834532312	0.113	0.042	1
CLTC	0.039825266	-0.294341875	0.194	0.25	1
RGS1	0.040684572	0.868051023	0.387	0.542	1
MIF4GD	0.040684572	0.708581332	0.161	0.25	1
TMEM192	0.040731091	0.772897915	0.097	0.208	1
EML4	0.040731091	0.453492603	0.403	0.292	1
CANX	0.04075483	-0.291179066	0.21	0.375	1
C19orf25	0.040760528	0.416300146	0.145	0.208	1
SF3A2	0.040763377	0.475491431	0.371	0.667	1
CYB5A	0.040764327	0.380503931	0.177	0.25	1
MFNG	0.040764327	0.917479576	0.306	0.167	1
DCTN2	0.04166714	0.63390375	0.21	0.417	1
PRRC2B	0.041687378	0.721985656	0.113	0.208	1
LSM2	0.041701836	0.501338152	0.371	0.292	1
HAX1	0.041711475	0.458349126	0.371	0.292	1
BTG3	0.041717258	0.475847776	0.371	0.375	1
DDX17	0.04172015	-0.566901932	0.5	0.458	1
SRPRA	0.04172015	0.637481373	0.371	0.125	1
SEC61A1	0.042642064	0.752078697	0.113	0.25	1
XPA	0.042687061	0.721342976	0.113	0.042	1
CLECL1	0.043473492	0.714806487	0.339	0.333	1
TNIP2	0.043671945	0.801816298	0.113	0.292	1
HIF1AN	0.043671945	0.861140628	0.081	0.125	1
CLTA	0.043687829	0.271105879	0.274	0.25	1
RB1	0.044702238	0.708922021	0.371	0.417	1
MPV17L2	0.044702238	0.313014965	0.048	0.125	1
TALDO1	0.044702238	-0.401451158	0.339	0.458	1
MOB3A	0.04470526	0.487105322	0.371	0.208	1
SDHAF1	0.045704759	0.612002196	0.097	0.292	1
SIT1	0.046790733	0.537357148	0.194	0.25	1
PCMT1	0.046790733	0.805325213	0.161	0.125	1
MT-ND2	0.046793844	-0.29147567	0.403	0.583	1
NAMPT	0.047868554	0.419802688	0.371	0.208	1
NELFCD	0.047869606	0.33746702	0.21	0.167	1
NCF4	0.048875408	0.375442443	0.403	0.292	1
TMEM140	0.048875408	0.340891286	0.129	0.208	1
RPRD2	0.048927666	0.389525038	0.129	0.417	1
PRDM2	0.048943666	0.472723756	0.387	0.333	1
AP2B1	0.048965	0.480383281	0.242	0.458	1
COMMD8	0.050043496	0.661619532	0.113	0.125	1
NOL8	0.050059722	0.547529694	0.081	0.208	1
TRMT1	0.050070539	1.122816637	0.21	0.125	1
AUP1	0.050070539	0.645783802	0.387	0.167	1
RWDD4	0.05007703	0.422020143	0.081	0.125	1
TRAP1	0.050080275	0.465301488	0.081	0.25	1
PAICS	0.051180581	0.414157413	0.097	0.292	1
TMEM165	0.051217875	-0.362277238	0.274	0.417	1
GPR137	0.051217875	-0.599134481	0.032	0.375	1
KIAA0040	0.051218972	-0.258762956	0.097	0.167	1
CCDC50	0.052244713	0.494435954	0.355	0.292	1
YME1L1	0.05237703	0.632194484	0.306	0.083	1
ELMSAN1	0.052378142	0.279967621	0.194	0.333	1
SNRNP35	0.053496036	0.617800941	0.113	0.208	1
SLC44A2	0.053547892	0.69785256	0.387	0.333	1
SMAP1	0.053547892	0.736337872	0.145	0.167	1
USP8	0.053554657	0.531930249	0.258	0.125	1
ACTB	0.054208632	1.013090527	0.726	0.708	1
SNRNP27	0.054761203	0.301237057	0.21	0.167	1
ADPRM	0.055890702	0.716485366	0.129	0.208	1
DPM1	0.055947446	0.500302755	0.113	0.25	1
CCDC88B	0.055964819	0.449780293	0.081	0.167	1
KYNU	0.0559764	0.417365269	0.29	0.25	1
SLC33A1	0.05598335	0.563994365	0.048	0.208	1
ADD3	0.057224642	0.322088607	0.306	0.333	1
GCC2	0.05723638	0.263700217	0.371	0.167	1
BAZ1B	0.05723638	-0.456409533	0.097	0.25	1
RNF125	0.058407949	0.760654279	0.145	0.125	1
HINT3	0.058466217	0.406178904	0.097	0.208	1
NDUFA6	0.058495949	0.273831084	0.419	0.333	1
MCRS1	0.059760503	0.417707781	0.097	0.333	1
RHEB	0.059778577	0.501499558	0.323	0.25	1
NDUFB2	0.059797856	-0.251888723	0.548	0.583	1
CHD2	0.059802676	0.435557819	0.339	0.042	1
TSR3	0.061096775	0.497539623	0.081	0.125	1
DNAJB4	0.061108981	0.316405388	0.387	0.25	1
HINT1	0.061119967	-0.596559889	0.387	0.583	1
TARS	0.062420413	0.416616231	0.097	0.167	1
TPT1	0.062463687	-0.501118763	0.5	0.625	1
LACTB	0.062463687	-0.410033	0.016	0.25	1
C5orf24	0.063786656	1.442282173	0.177	0.125	1
ALKBH5	0.063825475	0.776224151	0.065	0.125	1
LSM7	0.063830484	-0.263215218	0.339	0.542	1
MAP3K7	0.065177505	0.747342015	0.097	0.292	1
EIF4A3	0.06522062	1.117917431	0.355	0	1
MOB4	0.065221888	0.303319068	0.387	0.25	1
TNFRSF13B	0.066355777	0.604265908	0.387	0.25	1
DYM	0.066593271	0.525834794	0.145	0.167	1
SRSF9	0.066612531	0.584027544	0.097	0.292	1
KMO	0.066625371	0.711631095	0.097	0.125	1
HMGA1	0.066636927	0.628034231	0.242	0.083	1
PRNP	0.066638211	1.000346524	0.371	0.125	1
COA1	0.066638211	0.554538516	0.242	0.125	1
VASP	0.068034268	0.265161003	0.387	0.208	1
LIX1L	0.068034268	0.943107939	0.145	0.083	1
RBM4	0.068074567	0.432107431	0.387	0.708	1
PEA15	0.068079767	0.252348309	0.403	0.125	1
TTC13	0.069473175	0.671334868	0.129	0.333	1
CBX1	0.069500809	0.301359591	0.145	0.25	1
FADS3	0.069545552	-0.462441059	0.032	0.125	1
ZNF428	0.070993209	0.899145703	0.145	0.083	1
TRMT10B	0.071013189	0.559923801	0.081	0.125	1
PRR3	0.072511783	0.547177495	0.097	0.292	1
NFKBIZ	0.072557617	0.318346065	0.419	0.375	1
BCL11A	0.072557617	0.479975112	0.29	0.25	1
PSTPIP1	0.0739409	0.697495797	0.161	0.333	1
ASMTL	0.0739409	1.29949376	0.145	0.375	1
EGR1	0.074056846	0.739834967	0.403	0.417	1
FAIM	0.074077308	0.27293616	0.081	0.125	1
FOXJ3	0.07409095	0.462467781	0.065	0.125	1
HNRNPM	0.074099135	0.767115709	0.306	0.25	1
INIP	0.075449292	1.136143564	0.161	0.417	1
CORO1B	0.075628715	1.048358156	0.645	0.208	1
DNAJA1	0.075649419	0.417546146	0.339	0.375	1
C1orf162	0.075675644	0.565666512	0.177	0.083	1
LENG1	0.075677025	0.268896597	0.113	0.083	1
SDF2L1	0.077227707	0.61602716	0.129	0.167	1
CD180	0.077248653	0.443260792	0.097	0.125	1
WASF2	0.077248653	0.744609085	0.403	0.167	1
SP140	0.077276581	0.309254572	0.371	0.083	1
ARL14EP	0.078875327	0.518658903	0.129	0.208	1
THOC7	0.078902166	0.528376053	0.274	0.167	1
IFNAR1	0.078903578	-0.577972805	0.113	0.292	1
SLC2A1	0.080544046	0.94999043	0.097	0.208	1
SLC3A2	0.080556904	0.642576304	0.403	0.167	1
PPP1R7	0.082119792	0.788171498	0.194	0.292	1
ARHGEF3	0.082119792	0.915485973	0.129	0.125	1
DHPS	0.082212265	0.799226753	0.226	0.333	1
BRD7	0.082212265	-0.566730236	0.081	0.333	1
EMB	0.083829656	0.995503548	0.371	0.125	1
HSPE1	0.083870566	0.506228146	0.403	0.5	1
ZFP36L1	0.083870566	0.508911563	0.339	0.458	1
EMC8	0.083901248	0.659855031	0.097	0.125	1
IL27RA	0.085662775	0.740336832	0.161	0.083	1
OTUD1	0.085662775	0.504311604	0.081	0.25	1
SLC25A38	0.085677547	0.969323162	0.161	0.083	1
EFCAB11	0.085690842	0.418977213	0.032	0.25	1
ADK	0.085692319	0.368275859	0.387	0.167	1
ATP6V0B	0.085692319	0.256519997	0.468	0.333	1
CFAP97	0.087409012	0.536954698	0.145	0.167	1
VPS37A	0.087431414	0.324000896	0.081	0.292	1
BPNT1	0.087446348	0.426110258	0.065	0.292	1
PNRC2	0.087461282	-0.262574232	0.371	0.25	1
B2M	0.088027546	0.91460641	0.806	0.792	1
IRAK4	0.089229399	0.793816071	0.194	0.208	1
ZBED5-AS1	0.08925959	-0.431938696	0	0.125	1
C22orf46	0.091057048	0.817851515	0.081	0.5	1
SRFBP1	0.092859171	0.938891372	0.177	0.083	1
SSR3	0.092914678	0.423855328	0.339	0.292	1
NIF3L1	0.092914678	0.494417084	0.081	0.125	1
RPS8	0.092939347	0.250238022	0.355	0.5	1
MSL2	0.094802606	0.980752424	0.097	0.208	1
CARD8-AS1	0.094818185	0.479176505	0.065	0.292	1
FNBP4	0.094827532	0.707350377	0.371	0.208	1
MAP3K13	0.094827532	0.328573134	0.129	0.25	1
SYNE1	0.094832206	0.330328959	0.129	0.167	1
TPI1	0.094832206	-0.424912359	0.597	0.583	1
RPL18A	0.094833764	-0.327059477	0.194	0.292	1
PTP4A1	0.094833764	-0.632725057	0.339	0.25	1
IFI30	0.096697537	0.636203896	0.113	0.083	1
ID3	0.096721147	0.518704919	0.306	0.292	1
PHACTR4	0.098646768	0.927450999	0.129	0.208	1
OSBPL10	0.098670619	0.259158303	0.081	0.167	1
SRGN	0.099783758	0.85849172	0.677	0.375	1
SDCBP	0.10263928	0.53292164	0.403	0.292	1
CES2	0.10266361	0.358565916	0.081	0.25	1
KDELR1	0.102679829	0.476905238	0.242	0.25	1
HSD17B11	0.102694426	0.366385352	0.226	0.208	1
C19orf66	0.102696048	0.668761525	0.194	0.125	1
AFF4	0.102696048	0.640548534	0.387	0.042	1
VPS41	0.104724135	0.469612253	0.065	0.125	1
ARL6IP1	0.104738875	0.276995701	0.387	0.375	1
PSMD1	0.106724554	0.339217294	0.113	0.375	1
GART	0.106759283	0.643252318	0.097	0.208	1
UBE2W	0.106784088	0.339648479	0.081	0.208	1
BCKDK	0.106810547	-0.252330258	0.048	0.292	1
ANXA7	0.108919627	0.345733453	0.387	0.333	1
YIPF3	0.110866013	0.793463875	0.145	0.292	1
MRPS10	0.111009271	0.299197581	0.097	0.208	1
GPATCH4	0.111009271	0.521173336	0.113	0.125	1
DCK	0.111061511	0.288442156	0.258	0.375	1
ATP6V1E1	0.111066566	0.361817992	0.145	0.292	1
MAF1	0.111068251	0.868928836	0.323	0.167	1
UQCRFS1	0.111068251	-0.286501925	0.5	0.333	1
RPS26	0.111301952	0.899327893	0.468	0.833	1
HDDC2	0.113226304	0.679975771	0.194	0.125	1
SLC7A6OS	0.113236508	0.278807037	0.048	0.167	1
DNAJB1	0.114826785	1.134464585	0.323	0.25	1
ASCC2	0.115307609	0.708947573	0.129	0.25	1
EVL	0.115444926	0.356443802	0.452	0.333	1
GTF2B	0.115451792	0.432731722	0.355	0.125	1
CLTB	0.117633383	-0.368840848	0.097	0.458	1
OTUD6B-AS1	0.117687071	0.574301558	0.387	0.208	1
DBNL	0.119872386	0.649794477	0.403	0.167	1
LAMP1	0.119872386	0.341938739	0.113	0.125	1
IFNAR2	0.119909081	0.413309995	0.145	0.167	1
PEBP1	0.119952762	0.418982435	0.581	0.667	1
DDX39A	0.119968486	0.364791106	0.419	0.125	1
EIF5B	0.119970233	-0.45118139	0.21	0.583	1
SYNGR2	0.122279039	0.75864532	0.484	0.125	1
SIVA1	0.124618891	0.41936238	0.403	0.208	1
HLA-C	0.124624224	0.411401655	0.758	0.625	1
TMEM263	0.127006133	0.533977822	0.081	0.25	1
MVB12A	0.129403415	0.491495639	0.065	0.25	1
UNC13D	0.129421492	-0.304969819	0.016	0.125	1
LSM8	0.129421492	0.338822167	0.452	0.25	1
TRAC	0.13180858	0.922550111	0.274	0.208	1
PKM	0.13183592	0.492086823	0.419	0.333	1
GEMIN7	0.131854147	-0.575746315	0.065	0.375	1
RBM6	0.131854147	0.795981241	0.226	0.167	1
GPX4	0.131872372	-0.581956957	0.355	0.542	1
RNF141	0.131872372	0.709493874	0.177	0.083	1
THEM4	0.134138548	0.459960302	0.145	0.542	1
DERL3	0.136817043	0.28698768	0.194	0.25	1
RILPL2	0.136844824	0.387006867	0.355	0.208	1
C6orf62	0.139439183	0.699434144	0.21	0.375	1
IGHG1	0.141931582	0.263454017	0.21	0.167	1
UBE2J1	0.141931582	0.569686348	0.435	0.25	1
DHTKD1	0.142029387	-0.456676953	0.048	0.208	1
ZCRB1	0.142035029	0.352864682	0.21	0.25	1
STAT3	0.144662147	0.972585305	0.419	0.125	1
C12orf57	0.144667831	0.460294541	0.419	0.208	1
SLBP	0.152753949	0.385304095	0.435	0.5	1
NCK1	0.152753949	0.546742683	0.113	0.208	1
EBPL	0.155507819	0.784992296	0.097	0.208	1
PI4K2A	0.155537072	0.601135308	0.081	0.292	1
TDP2	0.155556573	-0.345827421	0.065	0.417	1
OSTF1	0.155556573	0.705918047	0.435	0.125	1
RRBP1	0.155568273	-0.560792082	0.048	0.25	1
LBH	0.155574123	0.727656501	0.419	0.208	1
SCAF11	0.155576073	0.927607191	0.5	0.167	1
ZNF101	0.158329063	0.519137788	0.113	0.25	1
MOSPD3	0.161218543	0.301313963	0.081	0.167	1
PPP1R8	0.161250169	-0.268293376	0.048	0.167	1
ARHGAP4	0.161250169	0.724207645	0.258	0.083	1
MZT2A	0.161250169	0.678093789	0.355	0.292	1
TBCB	0.161250169	0.48952041	0.274	0.333	1
ENTPD3-AS1	0.161256098	-0.396838166	0.032	0.208	1
IFNGR2	0.164087567	1.060958262	0.161	0.167	1
CXCR4	0.164117413	1.752738466	0.452	0.125	1
PRDX4	0.166764919	1.05531833	0.21	0.292	1
SAT1	0.166855085	0.327611894	0.371	0.542	1
ZNF276	0.167093424	-0.695221456	0.032	0.167	1
DNMT1	0.170032695	-0.321260056	0.081	0.417	1
RPL7L1	0.170064934	0.426841552	0.177	0.208	1
PUS7L	0.170070978	-0.866947716	0.032	0.333	1
PTPN18	0.172976613	0.506852995	0.145	0.167	1
EXOC7	0.173069879	0.522740524	0.097	0.125	1
TTC32	0.173069879	1.383063296	0.129	0.083	1
KRT18	0.173088125	-0.847198294	0.032	0.333	1
SMARCC1	0.173088125	1.214087728	0.194	0	1
PHF3	0.173090152	0.335567732	0.387	0.083	1
FCRLA	0.176106356	0.96980133	0.403	0.292	1
NTAN1	0.176126751	0.504129675	0.065	0.167	1
RANBP2	0.176138988	0.562996679	0.419	0.292	1
POLR2L	0.176147145	-0.28100734	0.548	0.542	1
SFT2D1	0.179236007	0.665307186	0.355	0.25	1
WDR1	0.182360956	0.377912004	0.323	0.208	1
BIRC6	0.182373335	0.583573395	0.226	0.167	1
ZFP36	0.185486887	0.966544524	0.565	0.292	1
CYTIP	0.188778176	0.783703853	0.339	0.042	1
KIAA1143	0.191861672	0.801227295	0.161	0.208	1
SPI1	0.19202945	0.64818064	0.306	0.125	1
YTHDF2	0.19202945	0.928491052	0.21	0.083	1
MRPS12	0.19202945	0.28737288	0.177	0.208	1
VOPP1	0.195330267	0.444349309	0.355	0.25	1
WDR59	0.198606835	0.607927968	0.097	0.292	1
BRIX1	0.198672497	0.316204509	0.177	0.167	1
RPSA	0.198680968	-0.270183419	0.371	0.458	1
EXOSC5	0.201945663	0.394736859	0.113	0.375	1
CFLAR	0.201990366	0.699880084	0.452	0.583	1
ACTN4	0.202056344	0.514669586	0.177	0.208	1
ACOT8	0.205370811	0.384629558	0.113	0.167	1
PPP1R15A	0.205488424	-0.290153806	0.435	0.375	1
ZC3H8	0.208837988	0.576765153	0.113	0.125	1
RPS29	0.208958281	0.574678745	0.516	0.458	1
S100A11	0.212209249	0.608718875	0.419	0.417	1
GCDH	0.212392696	0.340064492	0.097	0.125	1
HINT2	0.212392696	0.392705059	0.145	0.167	1
GPALPP1	0.212392696	0.480348439	0.097	0.208	1
FBXO4	0.212446631	0.496461043	0.065	0.125	1
SAMD4B	0.212446631	-0.417546246	0.065	0.375	1
FOS	0.215760464	0.562909771	0.387	0.292	1
TANK	0.216018344	0.284397977	0.355	0.125	1
AEBP2	0.219539251	0.440408432	0.097	0.208	1
HMGB2	0.219593633	0.5544039	0.371	0.292	1
GMPPB	0.22323116	0.380744419	0.065	0.292	1
RBPJ	0.223252996	0.829252118	0.274	0.25	1
CCDC58	0.226810757	0.754725732	0.113	0.208	1
SH3BGRL3	0.226889677	0.49394438	0.694	0.542	1
FERMT3	0.226889677	0.407272121	0.226	0.208	1
ERICH1	0.226911596	0.409921521	0.194	0.167	1
RANGRF	0.226911596	0.721260161	0.21	0.125	1
CACYBP	0.230635101	0.618359687	0.323	0.167	1
PAFAH1B3	0.230654897	-0.557687857	0.032	0.333	1
MPEG1	0.234346644	0.473086666	0.097	0.167	1
HLA-B	0.234379757	0.484816299	0.726	0.625	1
SLAMF6	0.234379757	0.38733746	0.081	0.125	1
DDIT4	0.238231861	0.505838996	0.403	0.375	1
RBM39	0.238234075	0.431694862	0.468	0.292	1
GAPDH	0.24190112	0.76359889	0.661	0.667	1
PEPD	0.242065548	0.850782166	0.161	0.167	1
TRIP11	0.24208554	0.420490854	0.032	0.333	1
ACAP2	0.242087761	0.865162779	0.419	0.042	1
MICU1	0.245860312	0.716758708	0.129	0.125	1
RARRES3	0.245962815	1.054894226	0.323	0.208	1
OCEL1	0.245962815	-0.319776489	0.065	0.208	1
CDK9	0.249738485	0.768242213	0.129	0.167	1
TUBA4A	0.249848002	0.655835025	0.403	0.208	1
TBRG1	0.249923969	0.453707285	0.435	0.083	1
TNRC6B	0.249926203	-0.273962908	0.323	0.25	1
BLVRB	0.253832804	-0.255879887	0.097	0.375	1
JUNB	0.25388881	0.483566378	0.371	0.292	1
TCEA2	0.25390897	-0.370737972	0.032	0.292	1
CRELD2	0.257751554	0.98646138	0.129	0.125	1
DUSP1	0.257814461	0.612228646	0.435	0.333	1
SLC25A11	0.257814461	1.05737908	0.161	0.25	1
ANXA2	0.257861632	0.610857317	0.339	0.458	1
MT-ND6	0.261968361	0.55949943	0.5	0.167	1
TOMM5	0.262011125	0.790726771	0.403	0.25	1
NDUFB6	0.262011125	0.286212686	0.371	0.25	1
ITSN2	0.262013375	0.788985746	0.403	0	1
ARHGAP15	0.262013375	-0.445272778	0.403	0.25	1
SSPN	0.265941227	0.545998619	0.242	0.333	1
TBC1D10C	0.266051794	1.057283344	0.419	0.25	1
C1orf122	0.266108189	-0.296011867	0.065	0.25	1
FBXO25	0.266121722	0.365011713	0.048	0.125	1
DAZAP1	0.266130743	-0.543755093	0.016	0.167	1
LSM3	0.27028339	0.356222128	0.274	0.208	1
CTSD	0.27028339	0.371712741	0.371	0.375	1
LEPROT	0.274371716	0.464052828	0.129	0.167	1
MBD4	0.274489466	0.572908371	0.29	0.167	1
UQCR10	0.274498522	0.302853359	0.532	0.417	1
HSPA1A	0.275233779	0.87062871	0.387	0.292	1
HSPA1B	0.277476208	0.501635796	0.387	0.333	1
TRAPPC2L	0.278726423	0.665727286	0.194	0.208	1
HDAC10	0.282964743	0.558657244	0.097	0.167	1
GOSR2	0.283021525	0.754490098	0.065	0.167	1
RECQL	0.283021525	0.597845553	0.145	0.208	1
UBL3	0.287192926	0.347334281	0.129	0.167	1
ATPAF2	0.287304398	0.26290809	0.097	0.292	1
NDUFA13	0.287383992	0.33773762	0.5	0.458	1
SNRPF	0.296197595	0.359685671	0.452	0.333	1
UROS	0.305110411	0.456941012	0.097	0.208	1
AHSA1	0.305181147	0.422833081	0.403	0.125	1
EGLN1	0.305187991	-0.287187196	0.032	0.167	1
MANF	0.309708194	0.934150497	0.145	0.125	1
PRPS2	0.309708194	0.380031825	0.081	0.125	1
ATF6B	0.309753844	0.542858789	0.194	0.125	1
CD27	0.313859535	0.588519243	0.452	0.458	1
MRPL48	0.314234394	0.916038092	0.161	0.083	1
INTS6	0.314353131	0.834501623	0.129	0.083	1
TXNIP	0.317145531	1.288259013	0.5	0.333	1
SLC2A11	0.318935626	0.686752132	0.097	0.167	1
HOTAIRM1	0.318935626	1.006007013	0.097	0.292	1
DDX24	0.319006406	0.364980892	0.5	0.333	1
POLR2H	0.323633772	0.565108819	0.113	0.208	1
PPP6R2	0.323711388	-0.268928843	0.032	0.125	1
SWAP70	0.323711388	0.701177623	0.452	0.208	1
RPLP1	0.328376784	-0.25943284	0.5	0.542	1
SRRM2	0.328454373	0.436056616	0.452	0.208	1
IGHA1	0.332742242	0.832237611	0.468	0.292	1
GNPDA2	0.332970663	0.498321784	0.145	0.167	1
PSAP	0.333198861	0.350077381	0.532	0.375	1
RPS18	0.333235352	0.329896925	0.339	0.375	1
LUC7L3	0.333235352	0.553066788	0.387	0.208	1
BANK1	0.333244474	0.661421741	0.468	0.333	1
TXN	0.337803492	0.627948343	0.419	0.542	1
FCRL2	0.337997334	0.262570583	0.097	0.292	1
CTSH	0.337997334	0.763583304	0.645	0.333	1
PLAC8	0.338054316	0.544470226	0.323	0.167	1
PEX16	0.338054316	0.728285371	0.097	0.167	1
TMEM134	0.342954513	0.543530338	0.226	0.083	1
NAA15	0.347853916	0.612342637	0.081	0.125	1
SRI	0.347853916	0.308601813	0.306	0.292	1
CCDC28A	0.35284349	0.434461172	0.145	0.208	1
MRPS11	0.357809592	0.486689127	0.097	0.167	1
OSER1	0.357852682	0.310991962	0.371	0.042	1
UGP2	0.35785495	0.270295212	0.194	0.25	1
PTRHD1	0.362888331	0.49686613	0.306	0.208	1
CRIP1	0.366469653	1.291943922	0.581	0.333	1
AK3	0.367884909	0.877840481	0.113	0.25	1
NAA25	0.36796628	0.602030307	0.081	0.125	1
HIST2H2BE	0.367988878	0.786240481	0.065	0.125	1
PKIG	0.368002435	1.062512202	0.323	0.083	1
PSMD8	0.373133828	0.758188148	0.306	0.167	1
STK17A	0.37834558	0.380848897	0.371	0.292	1
CDKN2AIPNL	0.383453306	0.651755532	0.129	0.125	1
SURF6	0.383556548	0.458529179	0.065	0.125	1
UBA7	0.388668452	0.686653864	0.129	0.208	1
MPC2	0.388847527	-0.267455073	0.323	0.375	1
ABCB4	0.388856477	-0.300937305	0	0.167	1
SERPINI1	0.388856477	-0.397001156	0.016	0.125	1
IER2	0.393990469	0.958639527	0.435	0.292	1
GLB1	0.394155626	0.29996371	0.065	0.167	1
FAM173A	0.399276223	0.928598234	0.161	0.125	1
HCFC1R1	0.399465386	0.849521494	0.226	0.25	1
TMEM109	0.399543226	0.982067549	0.258	0.083	1
HNRNPDL	0.399543226	-0.541050814	0.387	0.375	1
WIPF1	0.404907887	0.507627927	0.468	0.167	1
JMJD1C	0.404907887	0.529546982	0.419	0.25	1
FAM207A	0.404943347	0.312787127	0.048	0.292	1
GUK1	0.404943347	0.264776281	0.532	0.375	1
WDR77	0.404949995	-0.314039067	0.032	0.125	1
CMPK1	0.410327449	0.988491147	0.177	0.333	1
EVI2B	0.415856663	0.26691753	0.532	0.5	1
G3BP2	0.41587866	0.267718121	0.5	0.167	1
ZC3H18	0.415891857	-0.288099386	0.048	0.167	1
KARS	0.421417882	0.36356205	0.097	0.208	1
ZFP36L2	0.426838687	0.433347043	0.419	0.417	1
HSP90AB1	0.426945615	0.901502575	0.403	0.458	1
CCNL1	0.427000148	0.56673824	0.339	0.25	1
TRADD	0.427013234	1.082363962	0.226	0.125	1
RBMX	0.427019776	0.288612768	0.484	0.375	1
TMSB4X	0.429274778	0.924609855	0.597	0.583	1
MIF	0.432638297	0.295495812	0.581	0.708	1
IKZF1	0.43264698	1.034216296	0.242	0.083	1
ACAP1	0.43264698	0.350337869	0.516	0.417	1
C1orf35	0.438271448	0.294163898	0.081	0.25	1
PLEKHA1	0.438306018	0.260632642	0.048	0.167	1
ACO2	0.438312499	0.261305063	0.145	0.083	1
PLEKHJ1	0.443981797	0.705850072	0.435	0.375	1
ACTL6A	0.444024788	-0.592008509	0	0.292	1
HSP90AA1	0.454793908	0.728897071	0.452	0.458	1
ATP13A1	0.455550265	0.49188517	0.065	0.208	1
FBXO8	0.4555694	-0.397888512	0.032	0.208	1
DDX3Y	0.467283257	0.44259385	0.468	0.167	1
RWDD1	0.473162566	0.258651313	0.387	0.292	1
RNF113A	0.473204318	0.503746383	0.258	0.083	1
DDX18	0.479143559	0.889421293	0.355	0.25	1
RSRP1	0.479162222	0.257741998	0.516	0.333	1
PTP4A2	0.479164295	0.78337979	0.194	0.208	1
MGMT	0.485162958	0.638289636	0.323	0.125	1
HNRNPH2	0.491134634	0.428964381	0.113	0.208	1
TPST2	0.491165309	0.578961414	0.081	0.167	1
CCNH	0.491165309	0.517090165	0.468	0.292	1
UBE2D2	0.491206202	0.62231702	0.484	0.167	1
GOT2	0.497173892	0.540539539	0.113	0.25	1
ANAPC11	0.497246972	0.345617696	0.306	0.417	1
PIK3C3	0.497267266	0.741396068	0.065	0.167	1
NDUFAF1	0.497279442	-0.631333826	0.048	0.292	1
ALKBH8	0.497287558	0.253719193	0.016	0.167	1
GPR65	0.509401736	1.279197414	0.468	0.25	1
HSPA8	0.509549605	0.299650473	0.5	0.583	1
RAP1B	0.509549605	0.531324228	0.532	0.208	1
HCST	0.51544252	0.583521152	0.403	0.25	1
GNG2	0.515761689	0.39054456	0.484	0.208	1
ELOVL5	0.51576763	0.583275525	0.419	0.208	1
SRSF8	0.522000705	0.825155786	0.258	0.083	1
ZNF680	0.522008558	-0.712767699	0.016	0.25	1
KLF6	0.527857487	0.535799396	0.581	0.417	1
MSN	0.528266627	0.407469881	0.435	0.333	1
FNBP1	0.528266627	1.388408909	0.468	0.083	1
LINC00926	0.528286083	0.547075426	0.29	0.167	1
RSL24D1	0.528286083	0.454847157	0.306	0.333	1
HNRNPH1	0.534534364	0.954713638	0.323	0.208	1
HLA-DRA	0.534563285	0.328494906	0.452	0.458	1
SP110	0.534582563	0.461241171	0.419	0.292	1
TCEA1	0.534594128	0.416708744	0.548	0.417	1
RBM3	0.540936378	0.346093134	0.532	0.417	1
KIAA1551	0.547240741	0.648841649	0.516	0.25	1
RASGRP2	0.547344715	0.317305939	0.242	0.167	1
COTL1	0.553550278	0.502775184	0.371	0.625	1
DUSP2	0.553670106	0.804279363	0.419	0.375	1
CNN2	0.553756172	0.902568672	0.452	0.25	1
TMEM243	0.553774876	0.444244955	0.306	0.208	1
FXYD5	0.553774876	0.290948844	0.435	0.375	1
PPDPF	0.553774876	0.485937298	0.516	0.458	1
IL2RG	0.560221394	0.522763009	0.597	0.458	1
EZR	0.56667722	0.32972625	0.435	0.417	1
PNN	0.566739448	0.484721462	0.5	0.208	1
SET	0.566739448	0.446023483	0.452	0.5	1
PIAS1	0.566741278	0.428837302	0.484	0.333	1
ISCU	0.566741278	0.333980802	0.629	0.417	1
MARS	0.573242431	0.570910649	0.081	0.208	1
RHOH	0.573271378	0.565709553	0.339	0.125	1
FKBP15	0.573278614	-0.521995543	0.016	0.167	1
HLA-DQA2	0.573278614	0.543564774	0.452	0.417	1
VIM	0.579035777	0.263727667	0.532	0.583	1
ITGB7	0.579751355	0.955460158	0.242	0.333	1
BTN3A2	0.579849709	0.463074379	0.226	0.167	1
MT-CYB	0.586247445	0.361429605	0.677	0.75	1
FKBP3	0.586397688	0.333872153	0.097	0.208	1
MR1	0.586397688	0.54576795	0.097	0.125	1
ARID5B	0.586424185	0.317386912	0.548	0.333	1
CD44	0.586441846	0.395197356	0.452	0.375	1
PPCS	0.58645774	0.335360133	0.258	0.208	1
SUB1	0.593041174	0.74467885	0.516	0.5	1
ANAPC10	0.593084776	-0.278943226	0.065	0.375	1
CLEC2D	0.593095239	0.824538455	0.194	0.125	1
ACTR2	0.593102213	0.488332012	0.548	0.167	1
MALAT1	0.598367495	0.489947896	0.581	0.625	1
DIAPH1	0.599718937	0.511546421	0.129	0.25	1
MZB1	0.599761972	0.288804995	0.161	0.292	1
MAPKAPK5-AS1	0.599772299	0.851506832	0.129	0.125	1
ACTG1	0.606456008	0.517907656	0.694	0.667	1
EIF3A	0.606483178	0.395321977	0.532	0.25	1
CCT8	0.606489969	0.661252452	0.306	0.333	1
MYL12A	0.613175504	0.251542666	0.613	0.667	1
MRPL41	0.61322742	0.488985769	0.29	0.208	1
HHEX	0.613232443	0.405738479	0.097	0.167	1
BZW1	0.613232443	0.423430036	0.403	0.125	1
NUBP2	0.619953391	0.739311382	0.113	0.208	1
SMIM12	0.619978156	0.475675182	0.161	0.208	1
SH3BP5	0.619978156	1.205106855	0.258	0.208	1
SAMSN1	0.620004565	1.013105548	0.452	0.083	1
FIBP	0.620011167	0.6098695	0.274	0.167	1
IL32	0.626552071	0.405144184	0.226	0.583	1
PFN1	0.626763723	0.428755038	0.694	0.667	1
DCXR	0.626820645	0.255736855	0.129	0.25	1
EXOSC1	0.626820645	0.274585134	0.226	0.333	1
GPR183	0.640187752	0.453826548	0.484	0.333	1
CD82	0.640402512	1.222564321	0.5	0.292	1
LTB	0.640503443	0.506383844	0.419	0.375	1
ZSCAN16-AS1	0.640519206	0.334239703	0.145	0.208	1
BTG1	0.640528663	0.444715579	0.387	0.333	1
LRRFIP1	0.640533391	0.571492917	0.452	0.333	1
TROVE2	0.647351975	0.846756745	0.194	0.292	1
ADPRHL2	0.647432625	0.404830393	0.048	0.333	1
DNAJB6	0.647432625	0.474888059	0.403	0.292	1
SSB	0.647432625	0.27400687	0.532	0.417	1
LGALS1	0.653936364	0.584947505	0.484	0.458	1
AHNAK	0.654357908	0.811679492	0.5	0.417	1
TRMT61B	0.654367055	0.280097575	0.048	0.25	1
ERP29	0.654371628	0.653605972	0.387	0.292	1
IFI16	0.661331439	0.882434959	0.516	0.417	1
AIM2	0.66808814	0.642003725	0.226	0.208	1
IBTK	0.668279642	1.180591838	0.113	0.083	1
CARD16	0.668316432	1.379842427	0.194	0	1
YWHAB	0.668316432	0.269205942	0.548	0.5	1
IFITM2	0.675339325	0.573520436	0.597	0.375	1
PET100	0.67534799	0.844287982	0.452	0.208	1
ZNF264	0.682399096	0.620809623	0.048	0.125	1
RAD23A	0.682403345	0.658480253	0.452	0.208	1
PPWD1	0.689455816	0.504736733	0.113	0.125	1
SH3GLB1	0.696589701	0.62548723	0.258	0.125	1
TTC19	0.703709224	0.858808239	0.113	0.042	1
LSG1	0.703717213	0.269540875	0.048	0.25	1
SVIP	0.710868517	0.708007351	0.177	0.167	1
PEX1	0.710876333	0.26038994	0.048	0.125	1
TSPAN13	0.718064868	0.499471611	0.226	0.167	1
DHX30	0.725250883	0.353743782	0.081	0.167	1
NFATC2IP	0.725263321	0.763155729	0.065	0.25	1
TMEM106C	0.725274512	-0.678847094	0.032	0.208	1
CD79A	0.725275756	0.450239777	0.371	0.333	1
CD69	0.73206702	1.175930375	0.5	0.25	1
TSC22D3	0.732441827	0.420241507	0.581	0.375	1
SERTAD1	0.73249767	0.857933979	0.484	0.042	1
HLA-DQB1	0.732504951	0.396372087	0.435	0.333	1
SNX22	0.732504951	0.599531649	0.113	0.083	1
ATM	0.747037315	0.638550647	0.29	0.167	1
KCNQ1OT1	0.747047687	-0.476627982	0.032	0.375	1
RNASEK	0.747047687	0.876309084	0.419	0.375	1
TRA2A	0.74704884	0.335575322	0.419	0.042	1
S100A6	0.754105536	0.467845368	0.597	0.625	1
DESI1	0.754289801	0.51673725	0.113	0.167	1
GGA1	0.754313366	0.554400101	0.145	0.125	1
EXOG	0.754313366	0.674929978	0.129	0.292	1
SARS	0.754313366	0.621407781	0.161	0.292	1
LITAF	0.761640283	0.817657573	0.516	0.292	1
LDHA	0.761667546	0.390598689	0.548	0.25	1
CD84	0.761674088	-0.505063645	0.048	0.25	1
ANKRD44	0.769025693	0.31127428	0.5	0.083	1
MYH9	0.769025693	0.796541637	0.468	0.167	1
TRBC2	0.776389632	0.931306629	0.468	0.25	1
CD24	0.783747141	0.507043986	0.387	0.458	1
HGS	0.783762065	0.286721863	0.081	0.125	1
STIM2	0.783772013	0.284924301	0.081	0.167	1
HNRNPUL1	0.783772013	0.633513756	0.532	0.292	1
UCP2	0.783777982	0.46386165	0.419	0.417	1
PSMB10	0.791185877	0.581037112	0.5	0.083	1
HLA-A	0.791189725	0.254724504	0.629	0.542	1
LAMTOR2	0.791189725	0.549157435	0.194	0.292	1
SRSF7	0.798583857	0.882360484	0.484	0.375	1
ATP6V1C1	0.798616398	-0.405286698	0.032	0.125	1
MT-ND3	0.805912327	0.253806391	0.548	0.583	1
KTN1	0.80605237	0.314930421	0.129	0.333	1
RCSD1	0.80605775	0.658847622	0.468	0.167	1
TMSB10	0.813515258	0.2581479	0.516	0.458	1
THYN1	0.820956915	0.969189195	0.177	0.292	1
ARL6IP5	0.820974358	0.388795623	0.597	0.542	1
DYNC1I2	0.820995115	-0.657671116	0.081	0.375	1
POU2F2	0.821002587	0.574332302	0.452	0.292	1
JUN	0.828323768	0.949641618	0.516	0.375	1
MLEC	0.828432312	1.195279151	0.161	0.25	1
RPS12	0.828471369	0.753563144	0.435	0.417	1
SPCS1	0.82848332	0.518029327	0.629	0.542	1
QRSL1	0.828491286	0.813000355	0.21	0.125	1
PIP4K2A	0.84349639	0.898480088	0.113	0.167	1
CYB561A3	0.843522631	0.424548146	0.21	0.25	1
CHCHD1	0.843529918	0.493352851	0.129	0.25	1
PPP3CC	0.84353429	0.435690907	0.516	0.292	1
LUC7L2	0.851075211	0.315849316	0.258	0.167	1
SPIB	0.851077294	0.371485284	0.339	0.417	1
ARL11	0.851077989	-0.528928683	0.016	0.125	1
OSTC	0.851077989	-0.280882132	0.242	0.292	1
NCL	0.851077989	0.38357365	0.419	0.417	1
DBP	0.858609316	0.912651668	0.113	0.167	1
RRP1B	0.858619217	0.901390315	0.113	0.167	1
EMP3	0.858625817	0.723603699	0.565	0.458	1
SNHG8	0.858629777	0.388841325	0.323	0.208	1
PTPN1	0.866197308	0.783158833	0.548	0.208	1
MT-CO1	0.87344755	0.49756718	0.613	0.75	1
S100A10	0.873564026	0.601994088	0.613	0.708	1
KIAA0355	0.873746412	0.437408833	0.113	0.167	1
NHLRC3	0.873777126	0.367343392	0.048	0.167	1
PRPF38B	0.873779488	0.730110904	0.532	0.167	1
MED30	0.881370768	0.445976387	0.339	0.333	1
7-Sep	0.888970882	0.45142776	0.5	0.417	1
FRG1	0.888972964	0.897803545	0.194	0.083	1
SLC25A37	0.896558208	0.991954608	0.129	0.083	1
FAM104A	0.89657568	0.936589194	0.081	0.125	1
GMFG	0.896583443	0.473470205	0.468	0.375	1
HLA-DRB1	0.904202838	1.007702011	0.403	0.333	1
ZBTB7A	0.904206886	-1.12419055	0.032	0.375	1
ACAT1	0.911814921	0.465079328	0.113	0.333	1
TRIM8	0.911833982	-0.612100613	0.065	0.375	1
B9D2	0.911836467	0.344245044	0.048	0.125	1
GTF2I	0.911838124	-0.459004649	0.097	0.333	1
SMIM14	0.919469479	0.868040528	0.403	0.208	1
LMO4	0.927094604	0.696427173	0.145	0.25	1
SMARCA4	0.927119989	0.263948915	0.065	0.292	1
PTGES3	0.927122046	0.583340283	0.355	0.333	1
TNFAIP8	0.927122046	0.515378615	0.419	0.292	1
C19orf24	0.934773449	0.361458453	0.161	0.25	1
LCP1	0.942426164	0.40053852	0.565	0.375	1
RNF181	0.942432943	0.620033517	0.419	0.333	1
LBR	0.942435654	0.277150338	0.306	0.167	1
S100A4	0.949939488	0.788910114	0.581	0.583	1
ATP2B1	0.950095413	0.978857677	0.516	0.125	1
BRD2	0.950099175	0.769092686	0.516	0.083	1
FAM96A	0.950100115	0.667704603	0.484	0.167	1
UNC93B1	0.957762228	0.430323446	0.097	0.25	1
CCDC130	0.965438928	0.605904009	0.081	0.167	1
TSC22D1	0.973118252	-0.251642386	0.032	0.208	1
HLA-F	0.9807967	0.314660135	0.581	0.25	1
VAMP5	0.9807967	0.256390106	0.129	0.167	1
USP15	0.980796972	0.976965024	0.5	0.042	1
AKAP13	0.980797063	0.759145451	0.565	0.208	1
HMG20B	0.988476438	0.881348674	0.081	0.25	1
CALM1	0.988477308	0.597221193	0.452	0.417	1
MT-CO3	0.996156063	0.458950186	0.597	0.667	1
PDCD2	0.996158422	0.319594085	0.097	0.167	1
AP1S1	0.996158694	0.312871613	0.081	0.25	1
KCTD7	0.996158984	0.275274514	0.048	0.125	1
DDX3X	0.996158984	0.646770386	0.468	0.333	1
TBC1D15	1	1.169453679	0.113	0.083	1
WBP2	1	0.321861406	0.387	0.125	1
GLUD1	1	0.922053458	0.161	0.083	1
